# Supplementary material for: Synthesis and characterization of the physicochemical and magnetic properties for perfluoroalkyl ester and Fe(iii) carboxylate-based hydrophobic magnetic ionic liquids
Source: Royal Society of Chemistry journal article supplement (doi:10.1039/c5ra25002a), 2016-01-01
Supplement: c5ra25002a1.pdf [file c5ra25002a1.pdf]

## *Supporting Information*

# **Synthesis and Characterization of the Physicochemical and Magnetic Properties for Perfluoroalkyl Ester and Fe(III) Carboxylate-based Hydrophobic Magnetic Ionic Liquids**

**Omprakash Nacham, Kevin D. Clark, and Jared L. Anderson**

*Department of Chemistry, Iowa State University, Ames, IA 50011USA*

| <b>Table of contents:</b>                                                                                                  | <b>Page No.</b> |
|----------------------------------------------------------------------------------------------------------------------------|-----------------|
| <b>1. <math>^1\text{H}</math> NMR, <math>^{13}\text{C}</math> NMR, and <math>^{19}\text{F}</math> NMR spectra of 1a-5c</b> | <b>2-27</b>     |
| <b>2. Figure S1.</b>                                                                                                       | <b>28</b>       |
| <b>3. Figure S2.</b>                                                                                                       | <b>29</b>       |
| <b>4. Figure S3.</b>                                                                                                       | <b>30</b>       |
| <b>5. Figure S4.</b>                                                                                                       | <b>31</b>       |
| <b>6. Figure S5.</b>                                                                                                       | <b>32</b>       |
| <b>7. Figure S6.</b>                                                                                                       | <b>33</b>       |
| <b>8. Figure S7.</b>                                                                                                       | <b>34</b>       |

benzimidazolewithc16chainprotonnmr  
STANDARD 1H OBSERVE

<sup>1</sup>H NMR (DMSO-d<sub>6</sub>, 400 MHz)

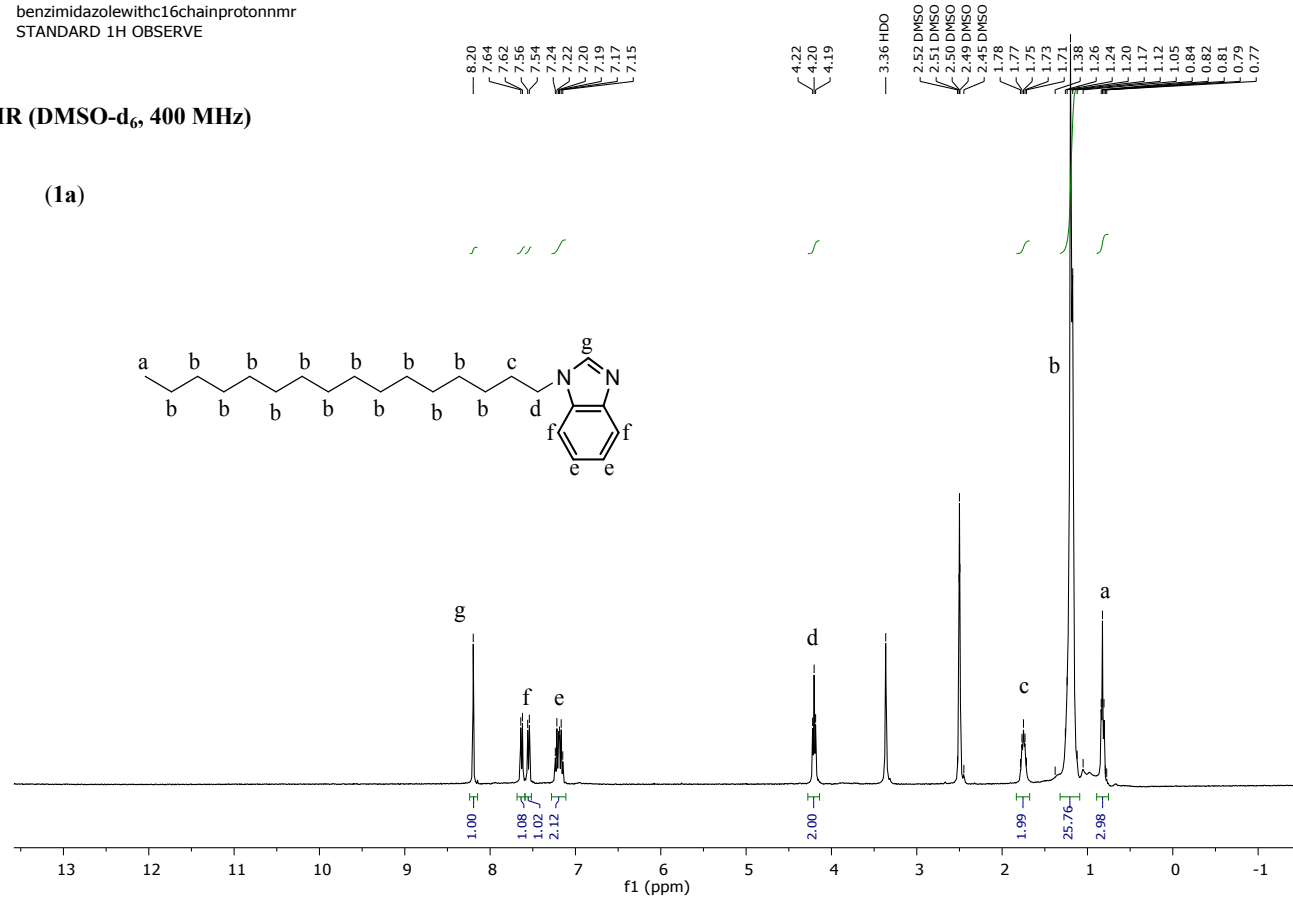

c16benzimidazolecarbonmndmsol  
13C OBSERVE

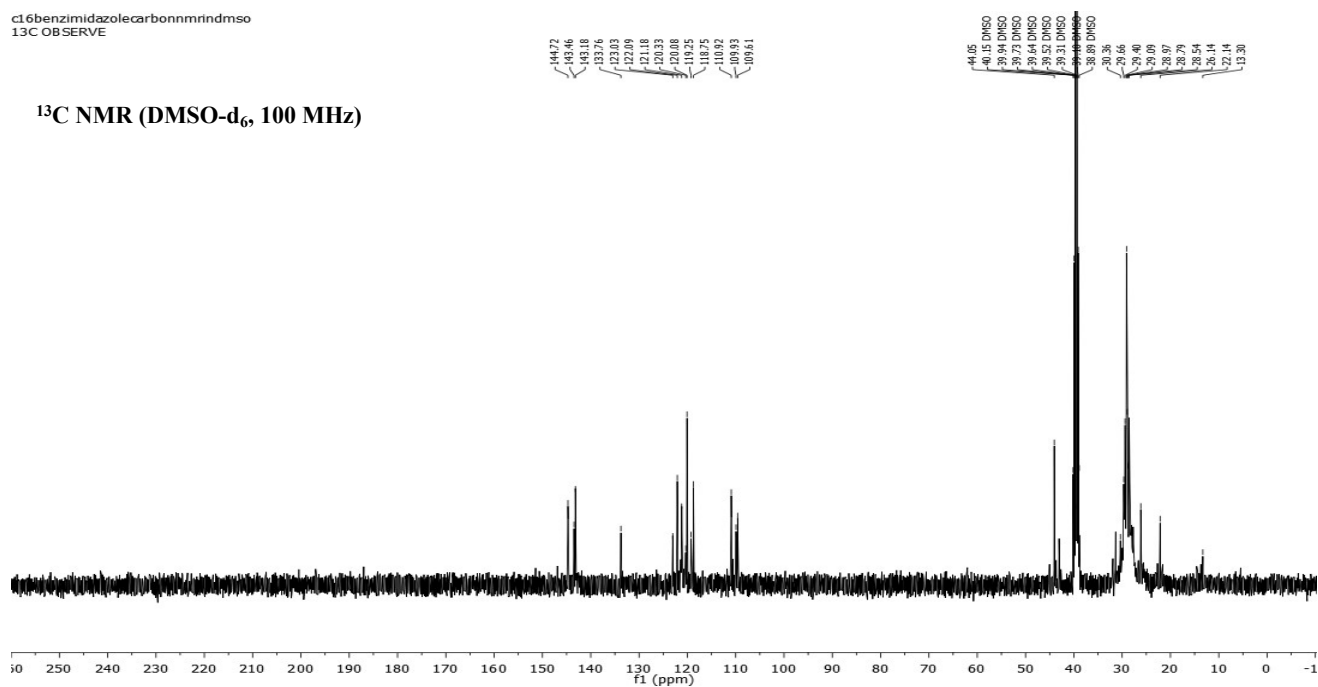



**$^{13}\text{C}$  NMR (CDCl<sub>3</sub> with 0.03 % v/v TMS, 100 MHz)**

benzylsubstitenyonbenzimidazolecarbonmr  
13C OBSERVE

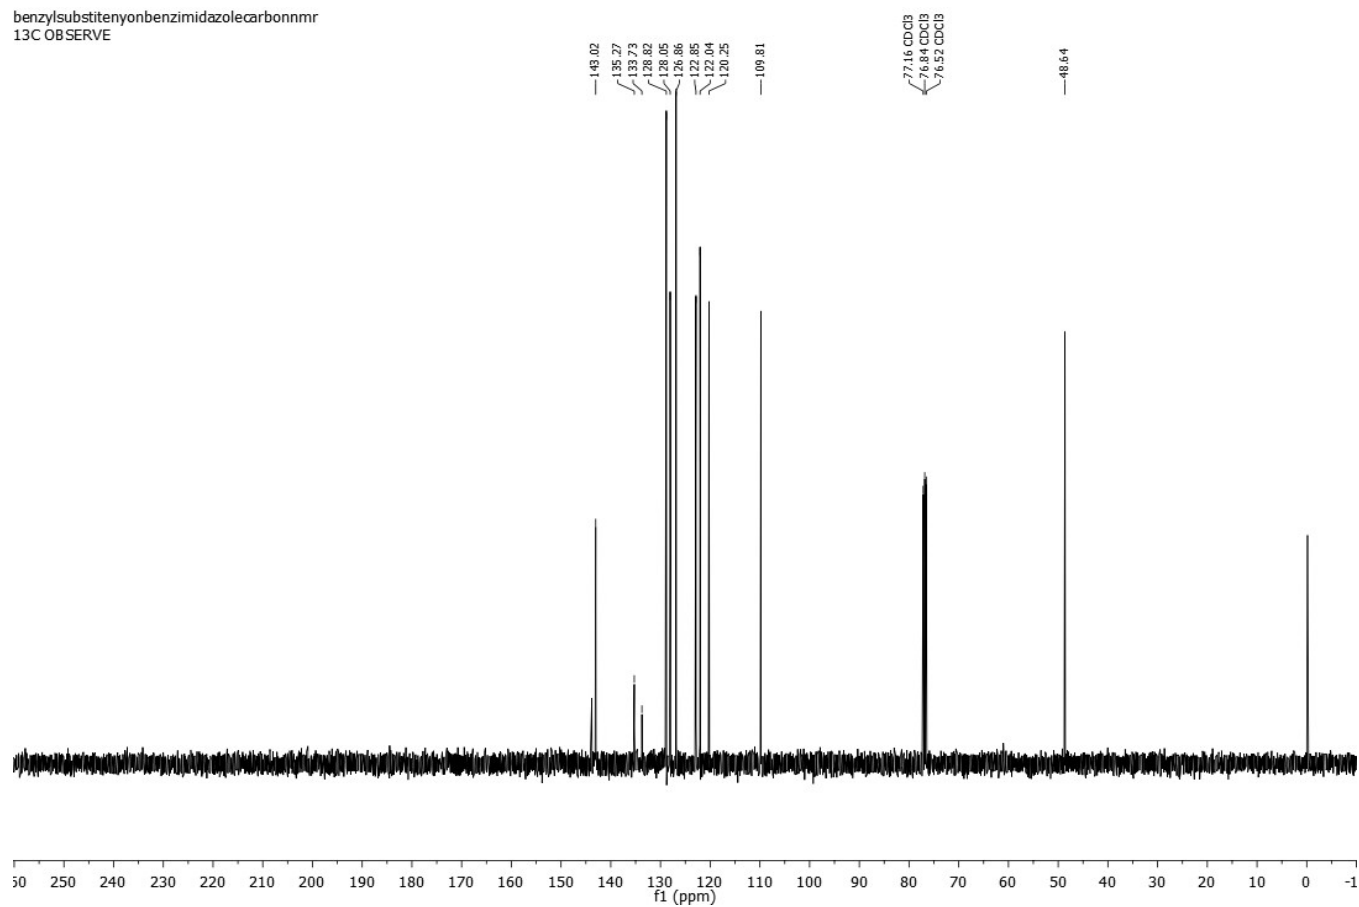

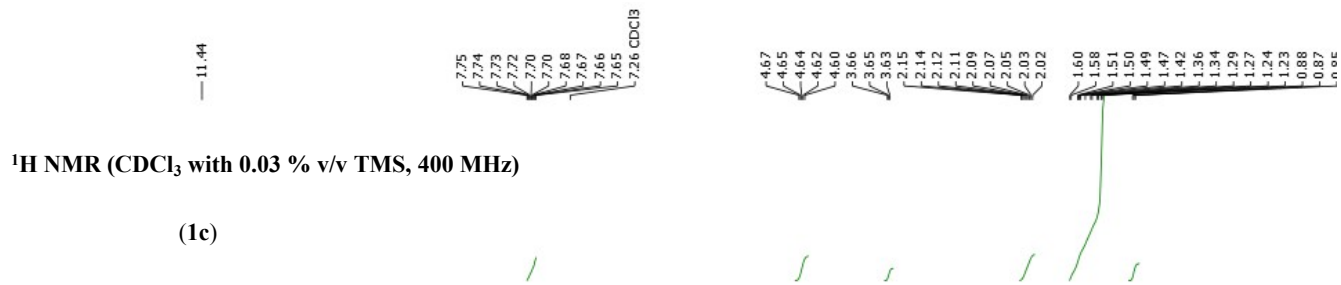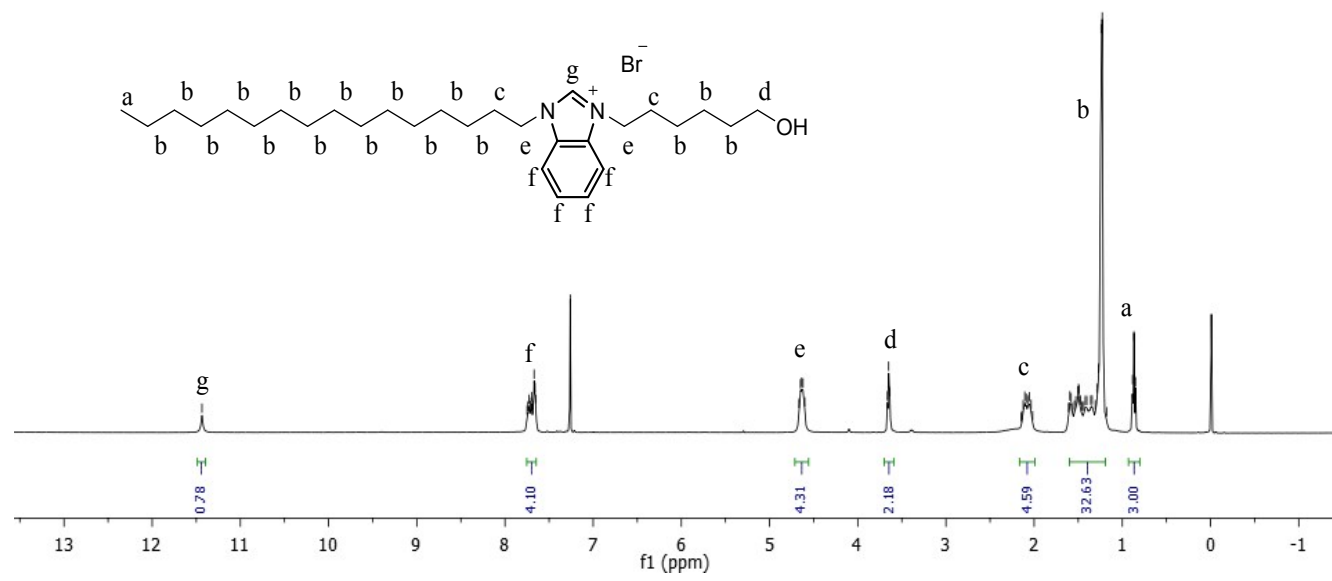

Pureperfluorobutylesterwithc6inbenzimidazolec16chainbromideanioncarbonnmr  
13C OBSERVE

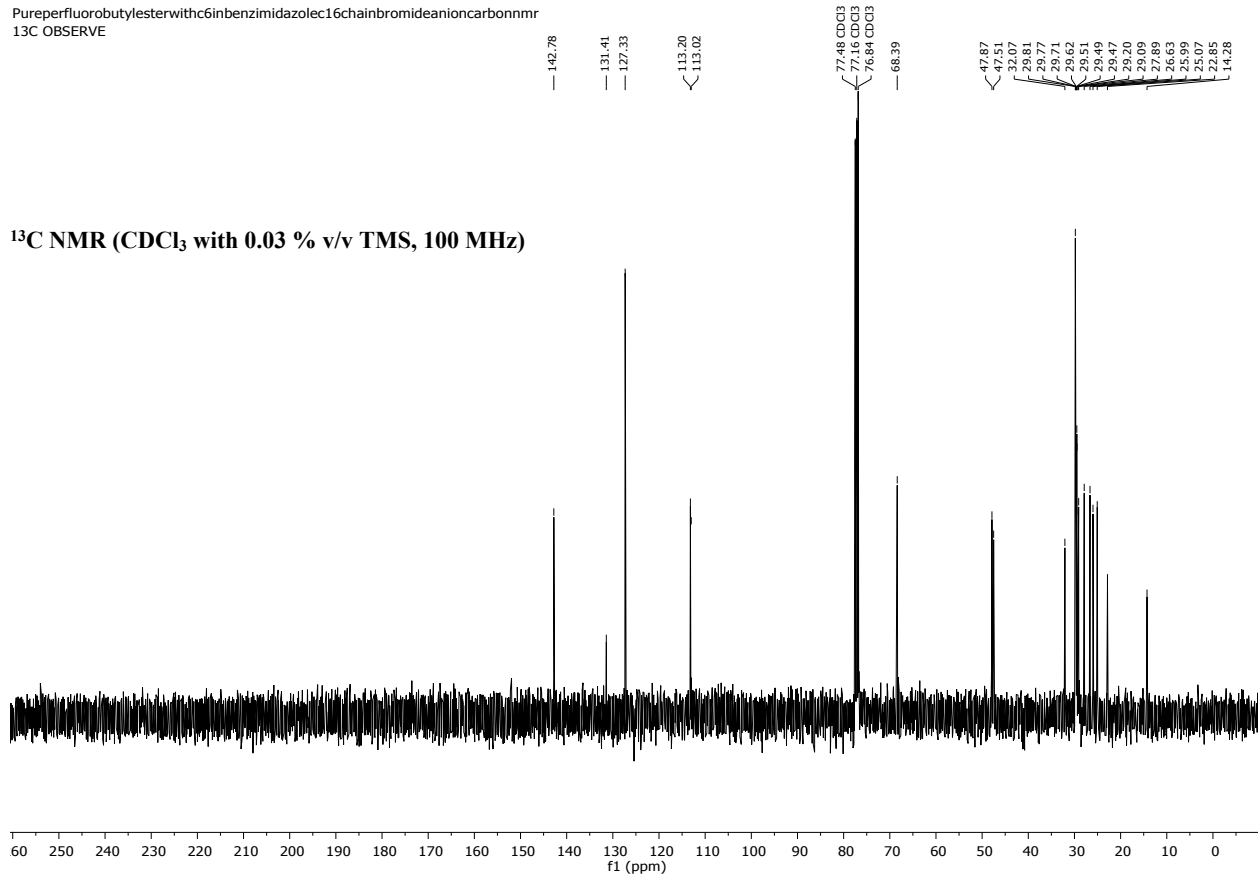

Pureperfluorobutylesterwithc6chaininc16benzimidazolewithbromideanion  
STANDARD 1H OBSERVE

<sup>1</sup>H NMR (CDCl<sub>3</sub> with 0.03 % v/v TMS, 400 MHz)

(1d)

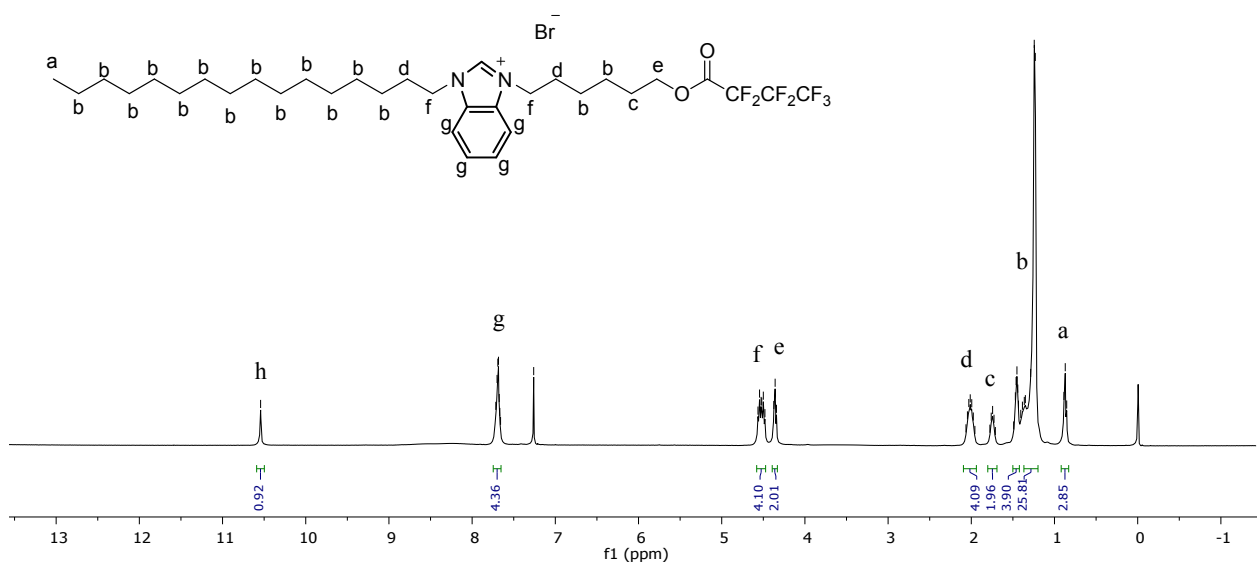



Pureperfluorobutylesterwithh6inbenzimidazolec16chainbromideanioncarbonnmr  
13C OBSERVE

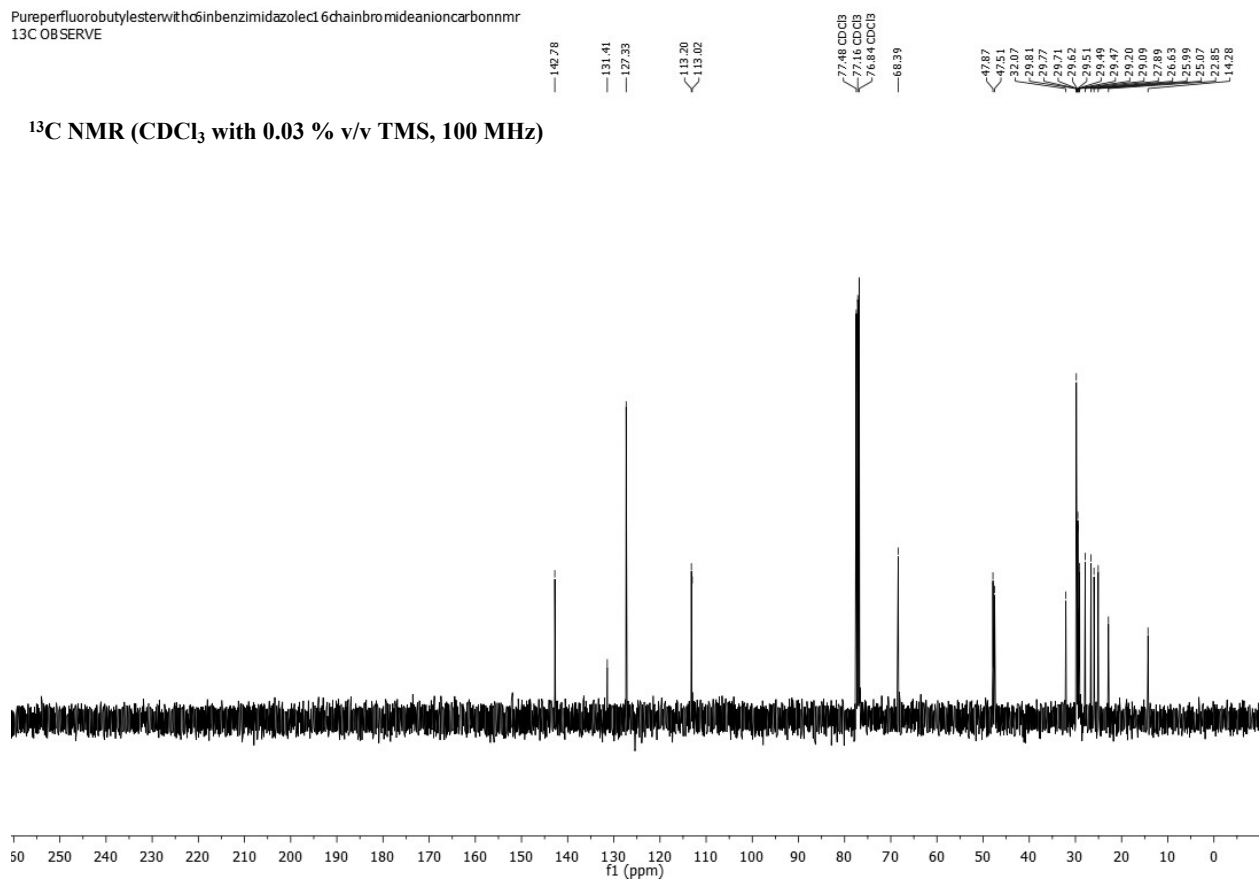

F19NMRforpurefluorobutylesterwithc6chaininbenzimidazolewithbromideanionfluorinenmr  
 F19 OBSERVE  
 STANDARD PARAMETERS

-81.202  
 -81.225  
 -81.27  
 -81.29  
 -81.31  
 -81.34  
 -81.36  
 -81.39  
 -119.58  
 -119.60  
 -119.62  
 -119.65  
 -119.67  
 -119.86  
 -119.89  
 -119.91  
 -119.93  
 -119.96  
 -127.35  
 -127.50  
 -127.53  
 -127.59  
 -127.64

**<sup>19</sup>F NMR (1d)**

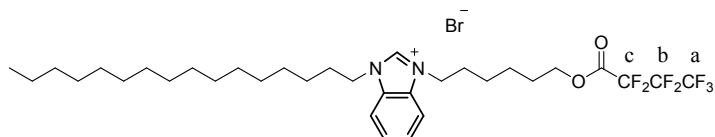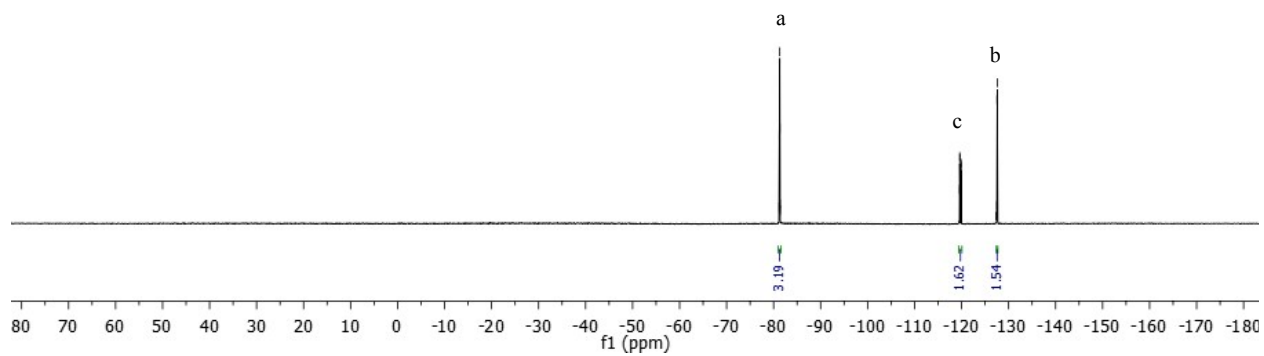

<sup>1</sup>H NMR (CD<sub>3</sub>OD, 500 MHz)

(2b)

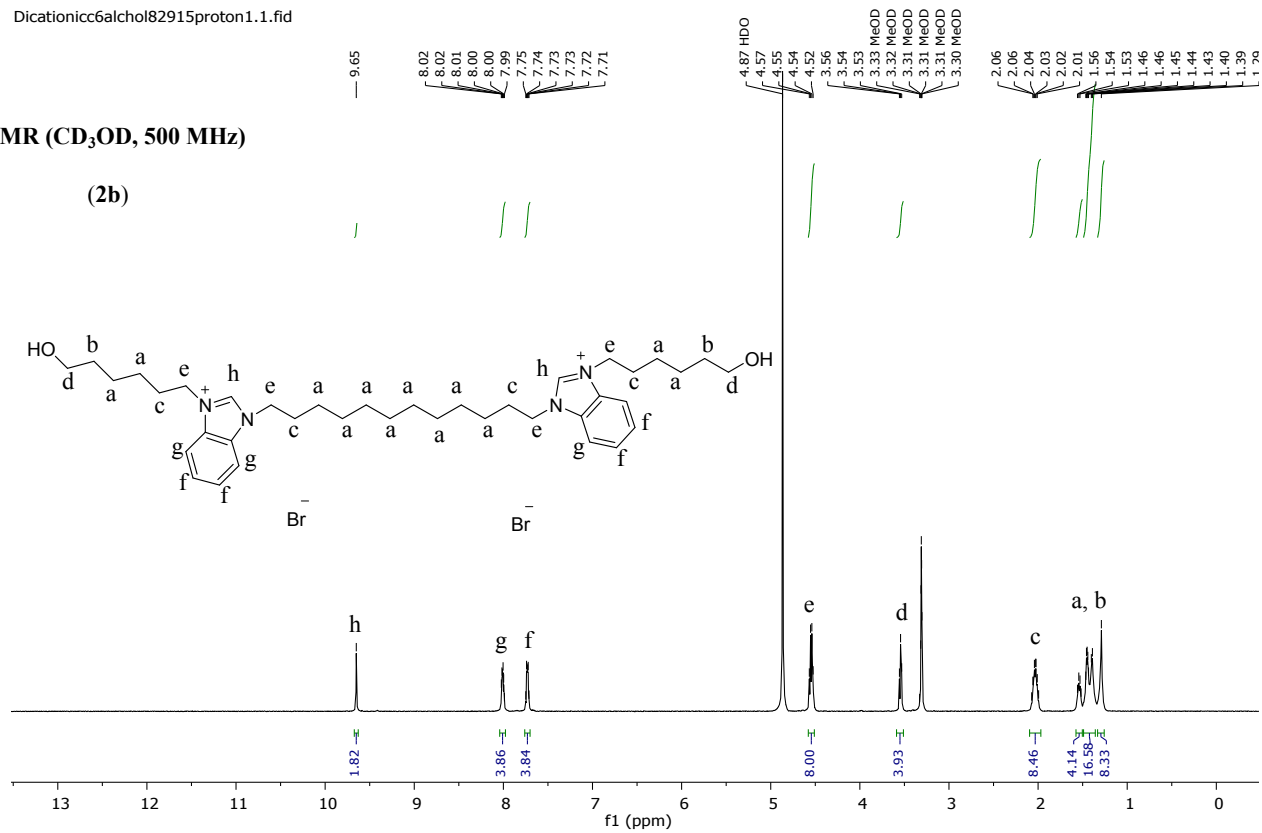

<sup>13</sup>C NMR (CD<sub>3</sub>OD, 400 MHz)

Dicationicc6alcohol82915carbon1.1.fid

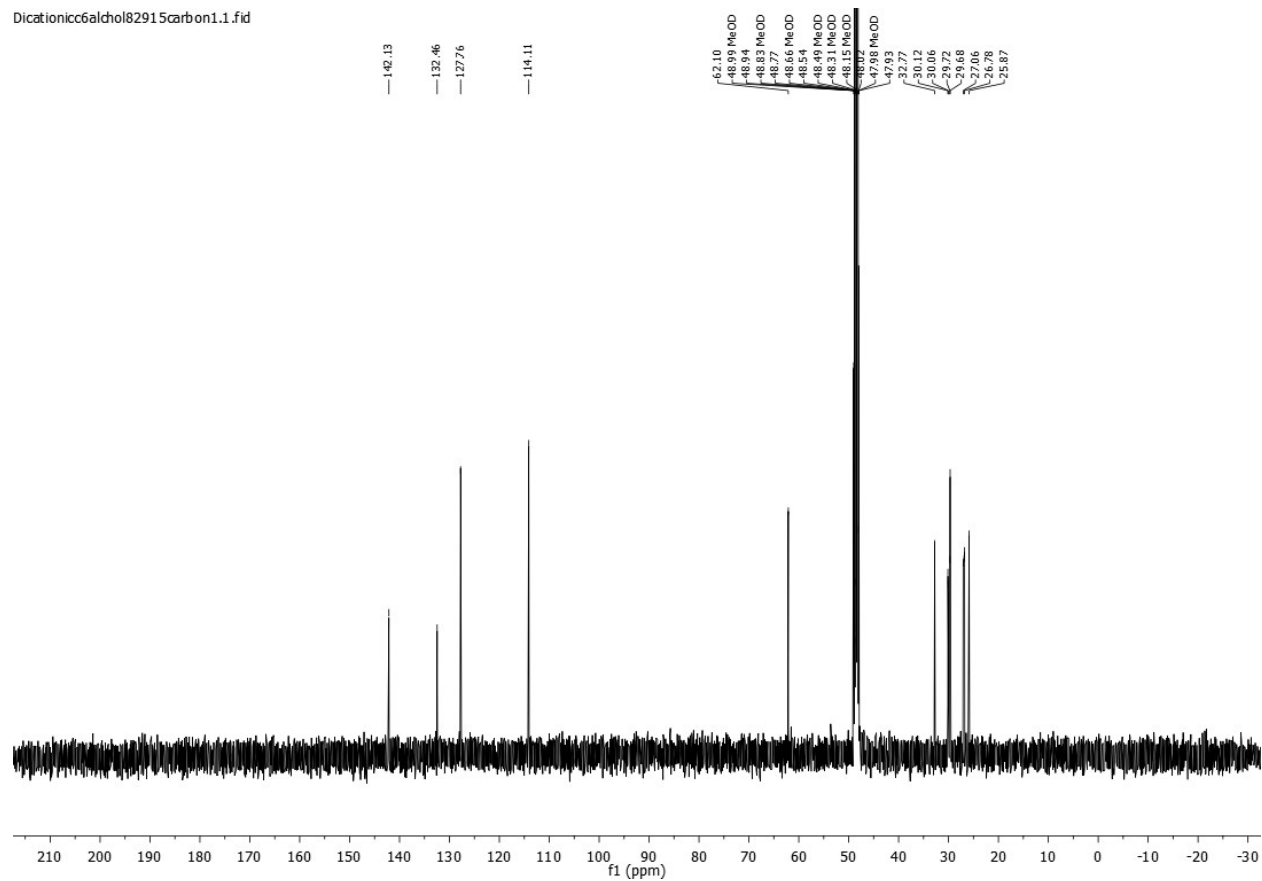

dicationicr4bromide83115proton.1.fid

<sup>1</sup>H NMR (CD<sub>3</sub>OD, 400 MHz)

(2c)

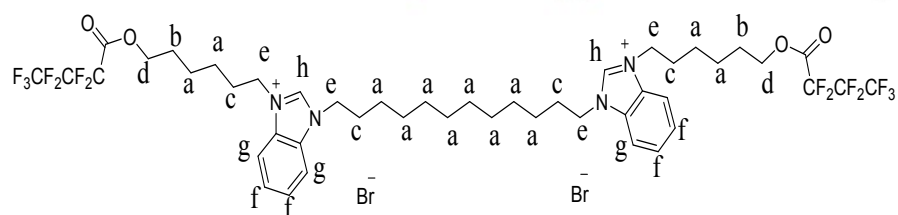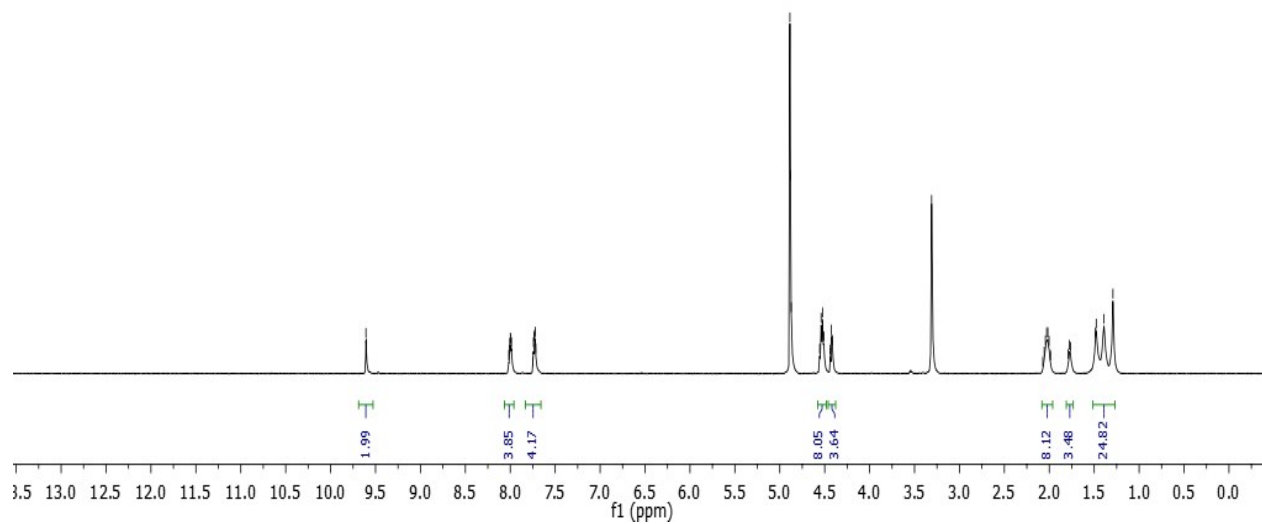

dicationicr4bromide83115carbon.1.fid

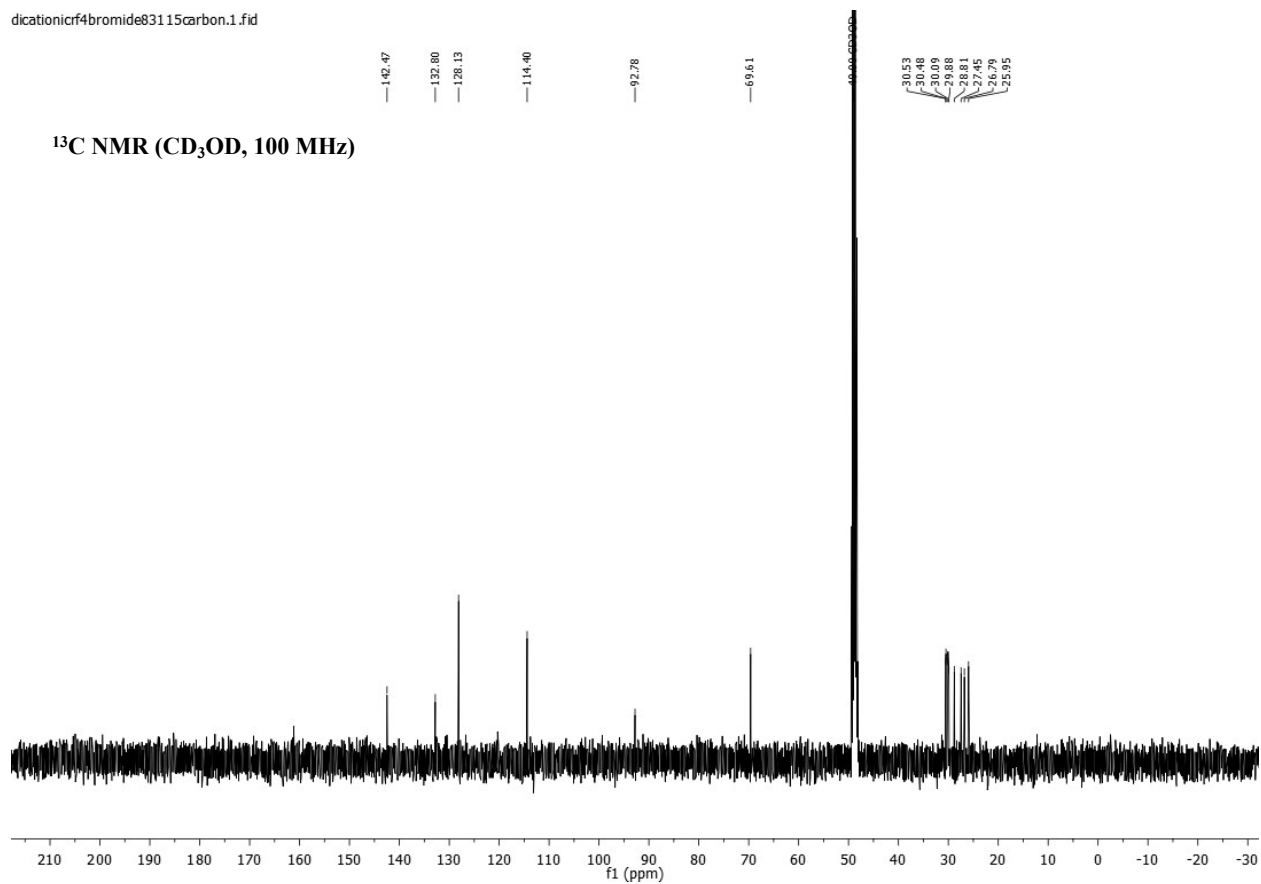

rf41  
Probe tuning parameter

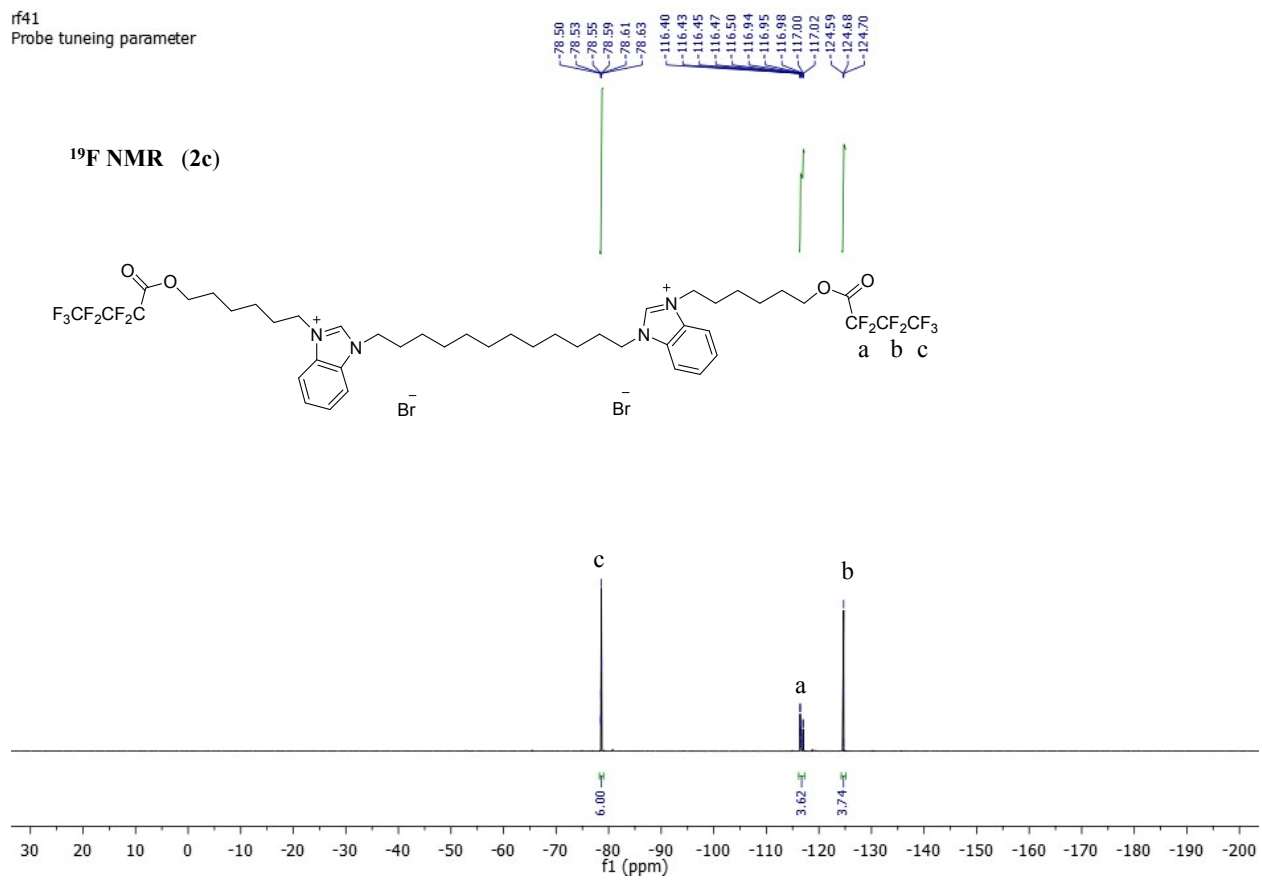

Nbenzylbromodecanoic acid bromide proton nmr  
STANDARD 1H OBSERVE

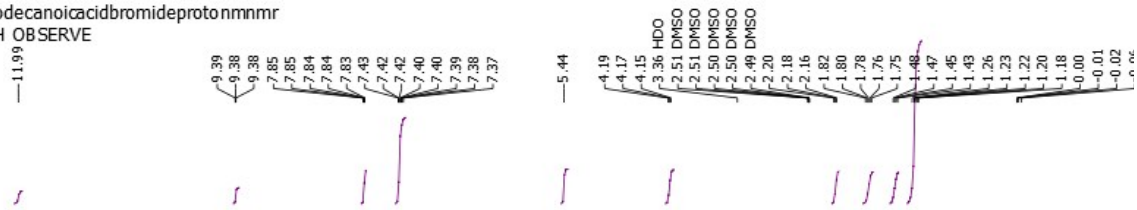

<sup>1</sup>H NMR (DMSO-d<sub>6</sub> with 1 % v/v TMS, 400 MHz)

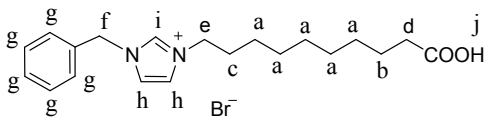

(3a)

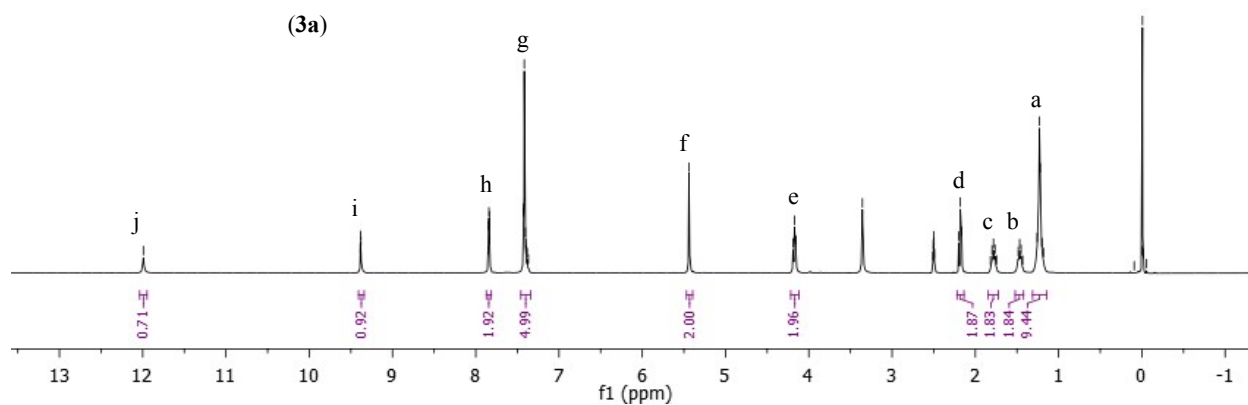



Nbenzylbromodecanoic acid bromide carbonmr  
13C OBSERVE

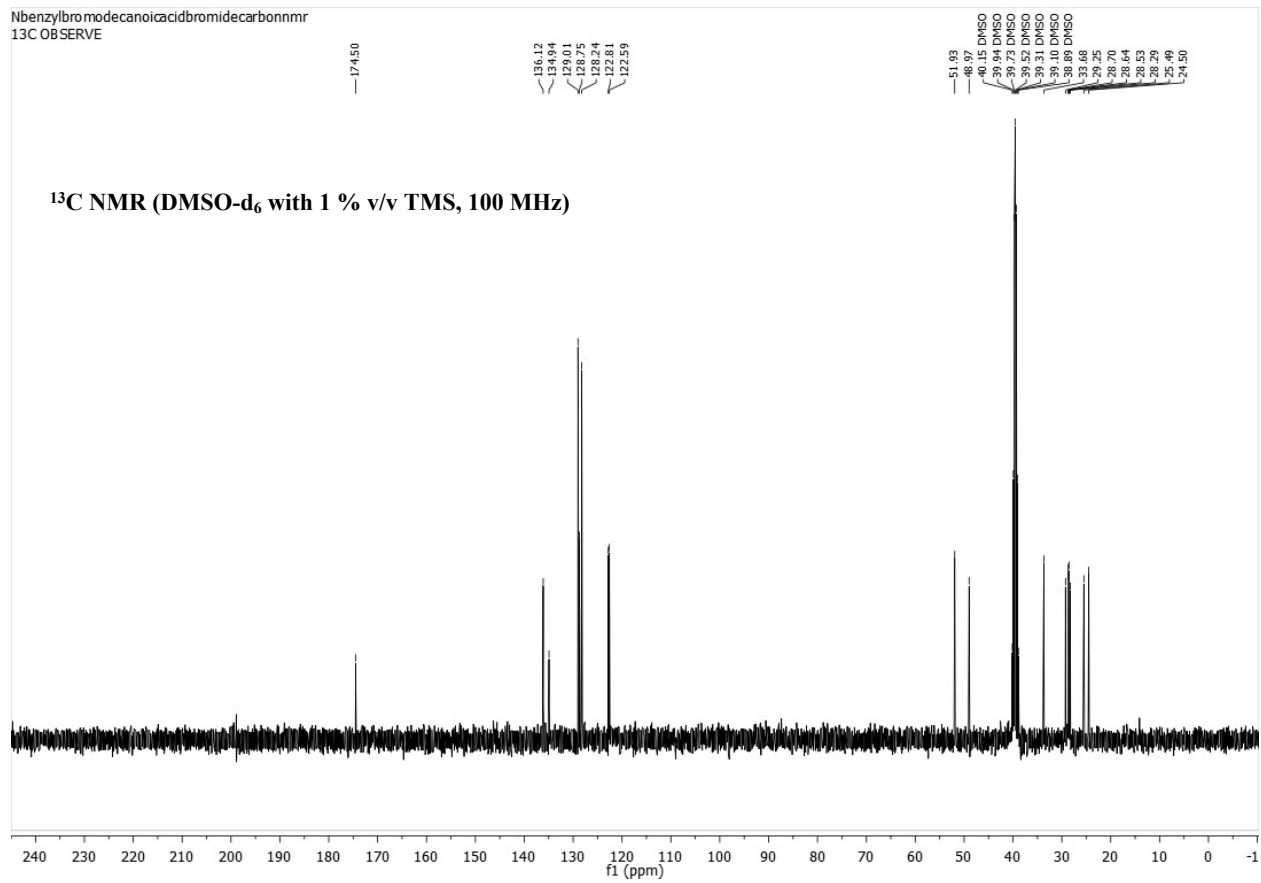

N-benzylimidazoledecanoic acidNTF2protonnmr  
STANDARD 1H OBSERVE

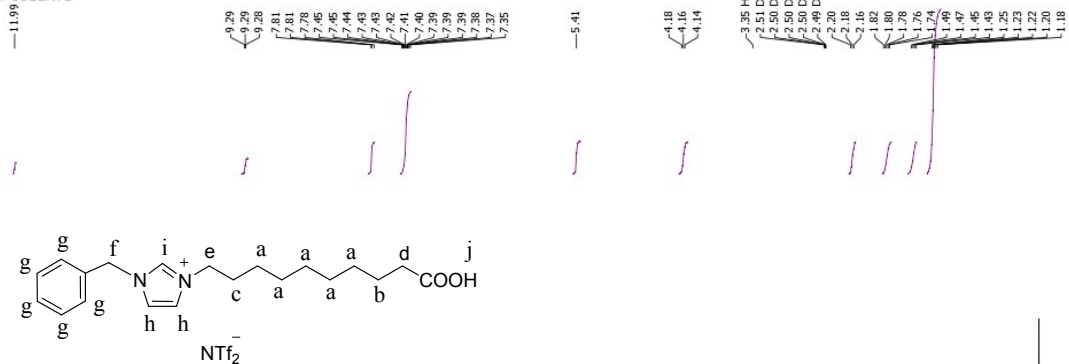

<sup>1</sup>H NMR (DMSO-d<sub>6</sub> with 1 % v/v TMS, 400 MHz)

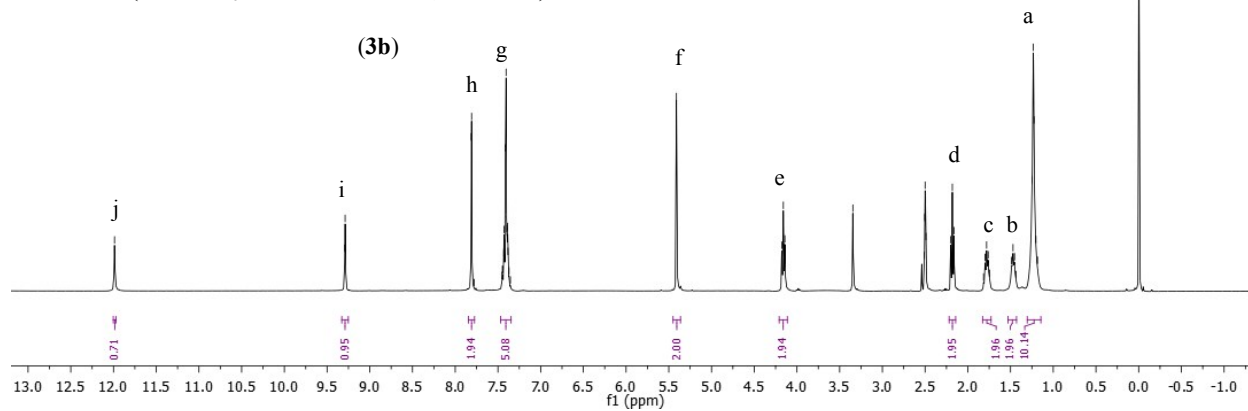

NbenzylimidazoledecanoicacidNTF2carbonnmr  
13C OBSERVE

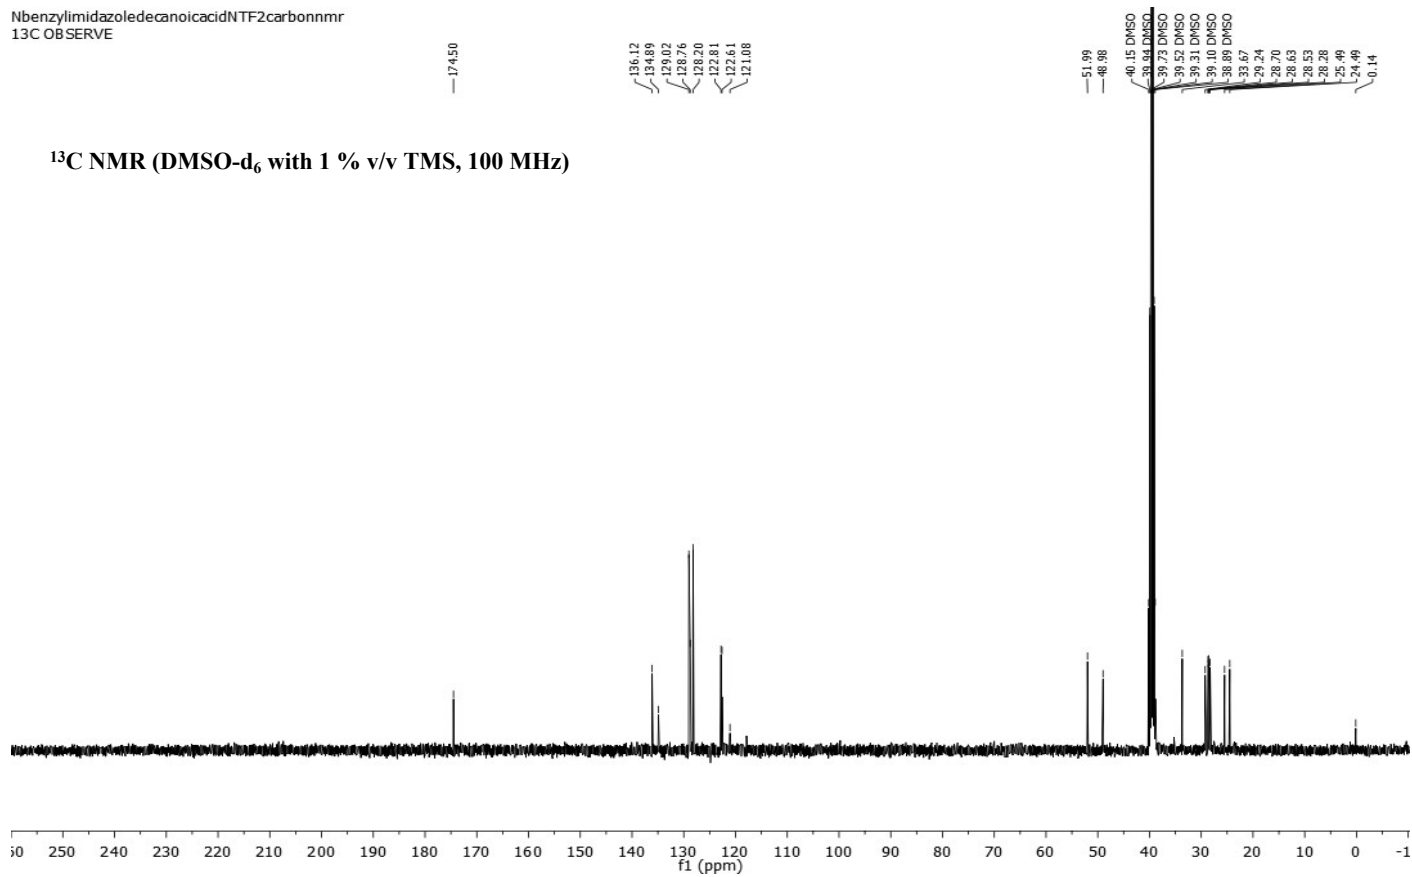

c16benzimidazolec10carboxyiacidbromideanionprotonmr  
 STANDARD 1H OBSERVE

<sup>1</sup>H NMR (DMSO-d<sub>6</sub> with 0.03 % v/v TMS, 400 MHz)  
 (4b)

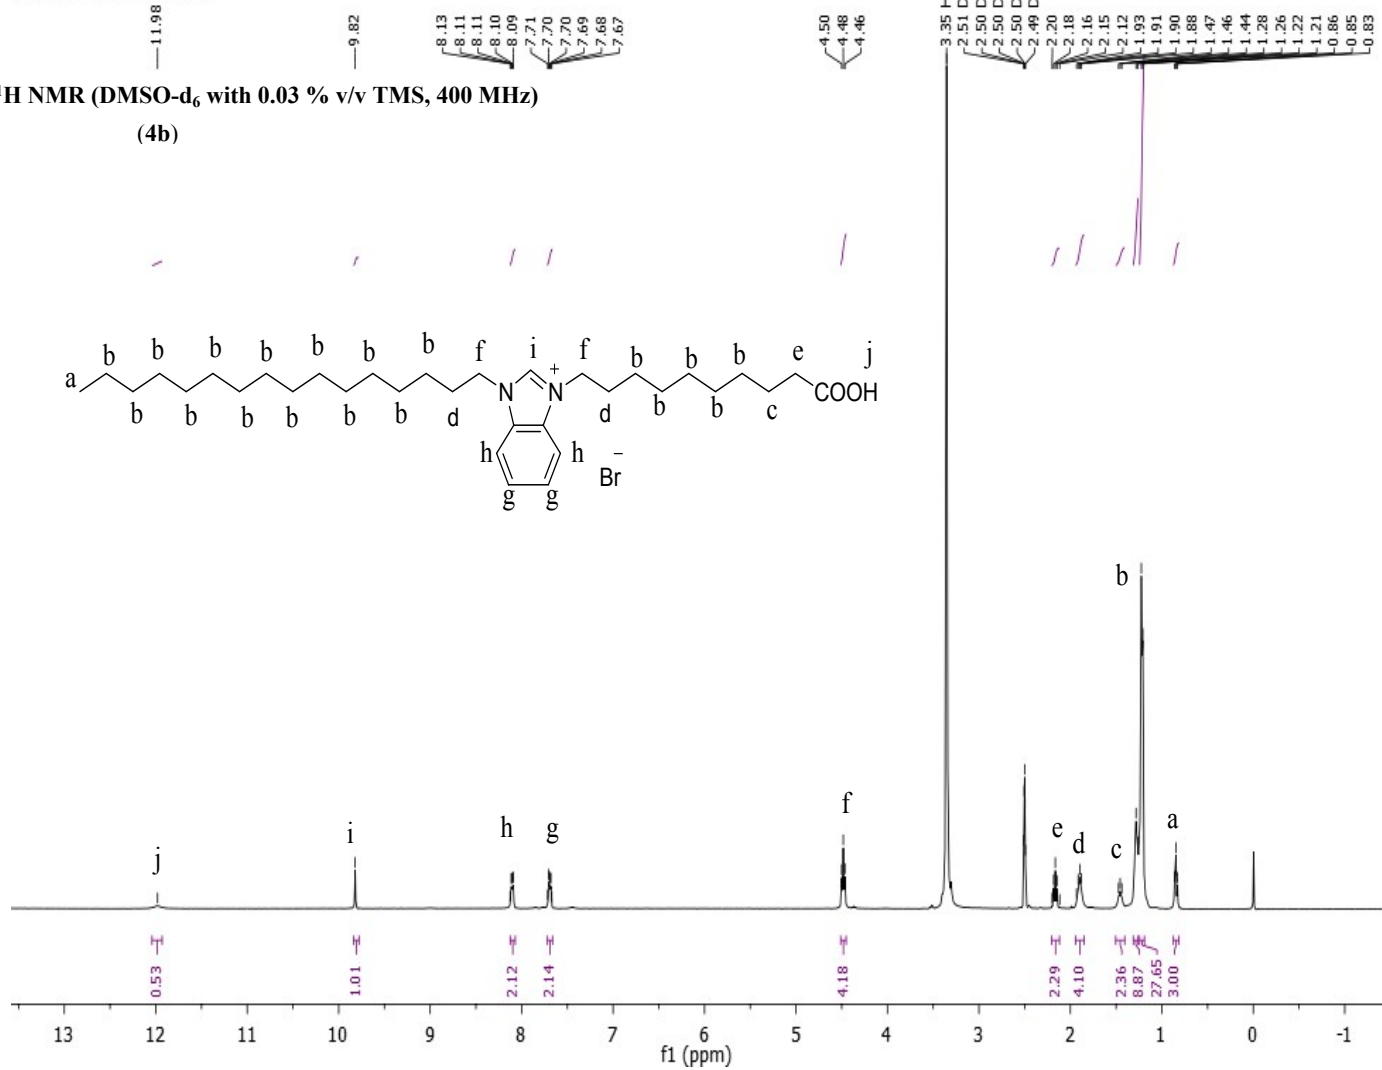

c16benzimidazoledecanoicacidbromideanioncarbonnmr  
13C OBSERVE

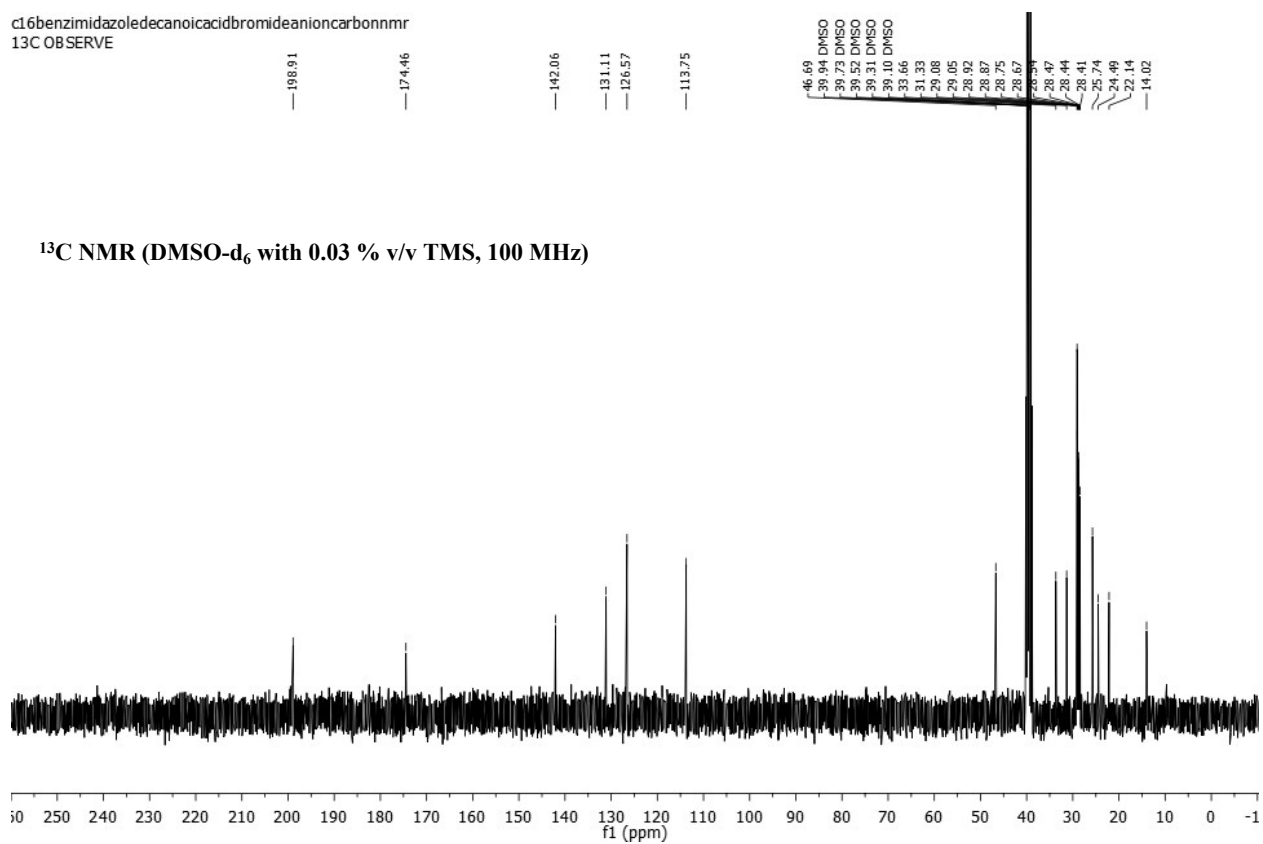

c16benzimidazoledecanoicacidNTF2proto nmr  
STANDARD 1H OBSERVE

<sup>1</sup>H NMR (DMSO-d<sub>6</sub> with 0.03 % v/v TMS, 400 MHz)

(4c)

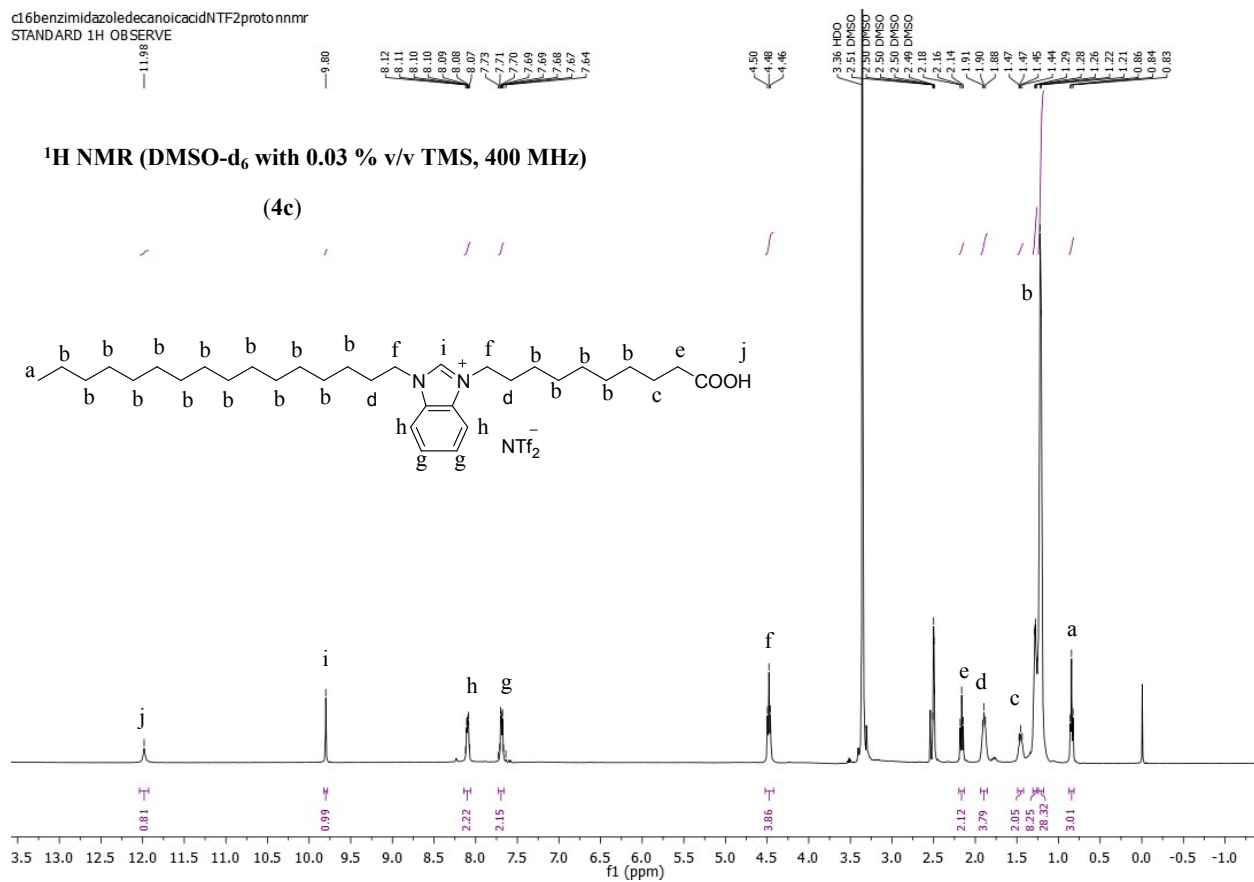

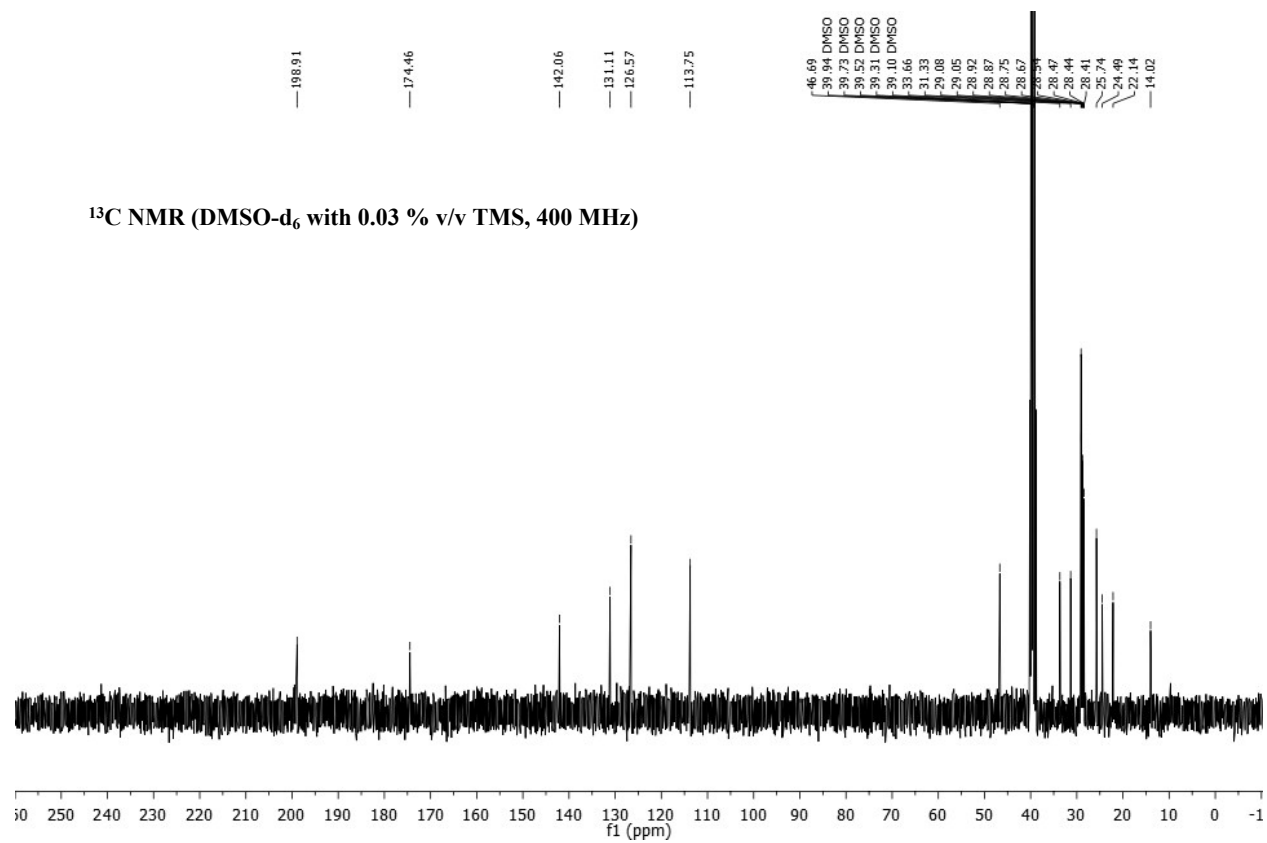

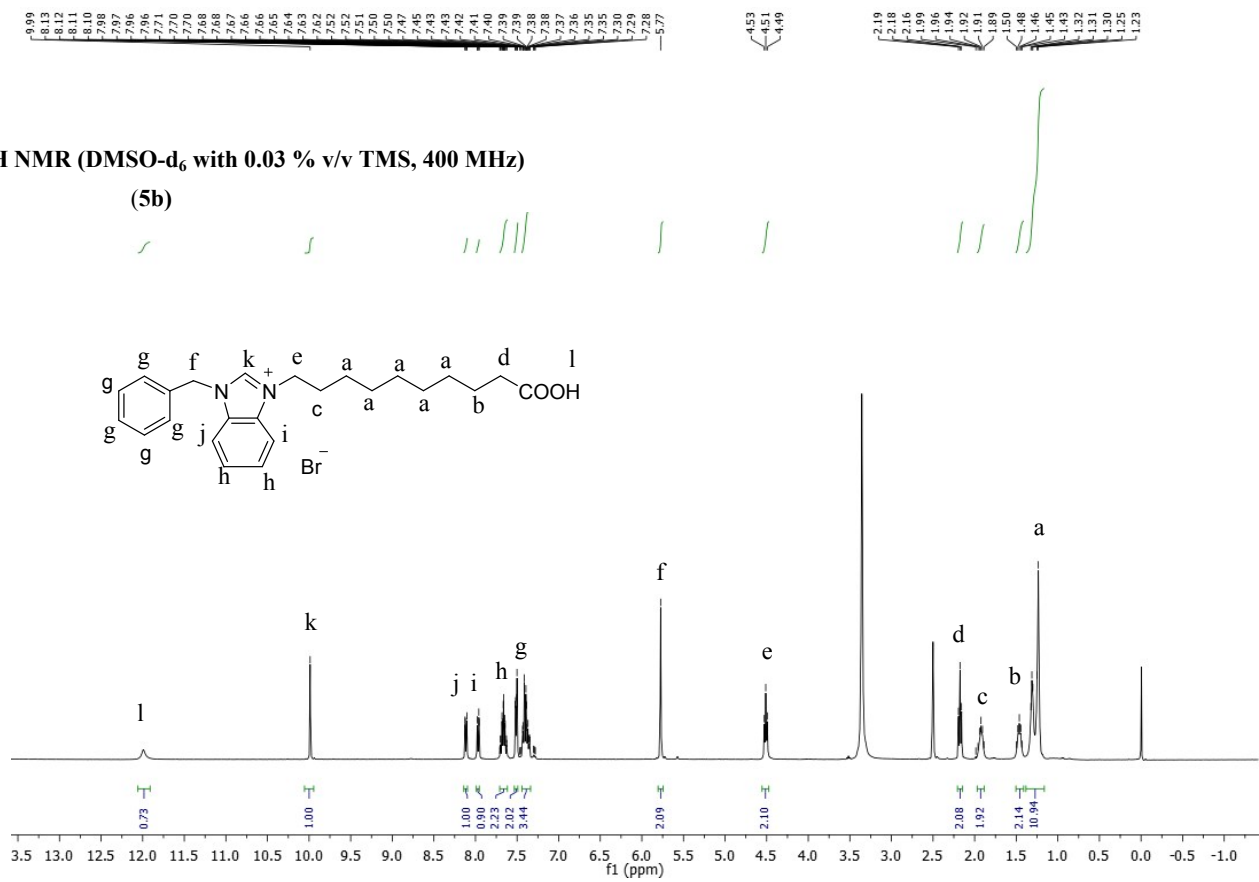



**<sup>13</sup>C NMR (DMSO-d<sub>6</sub> with 0.03 % v/v TMS, 100 MHz)**

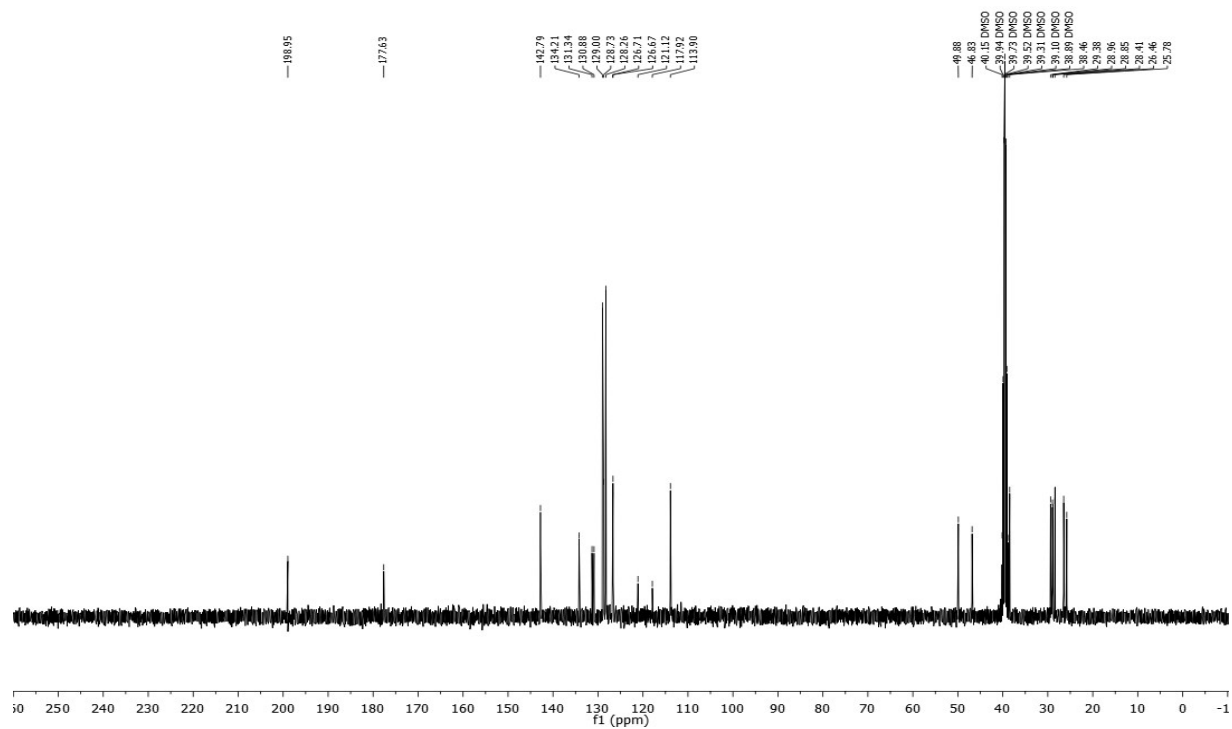

**<sup>1</sup>H NMR (DMSO-d<sub>6</sub> with 0.03 % v/v TMS, 400 MHz)**

**(5c)**

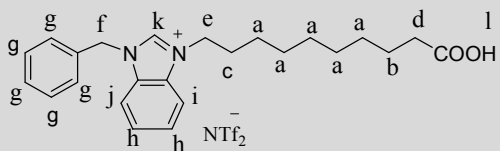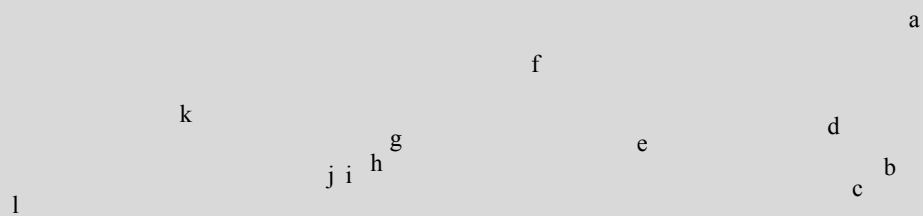

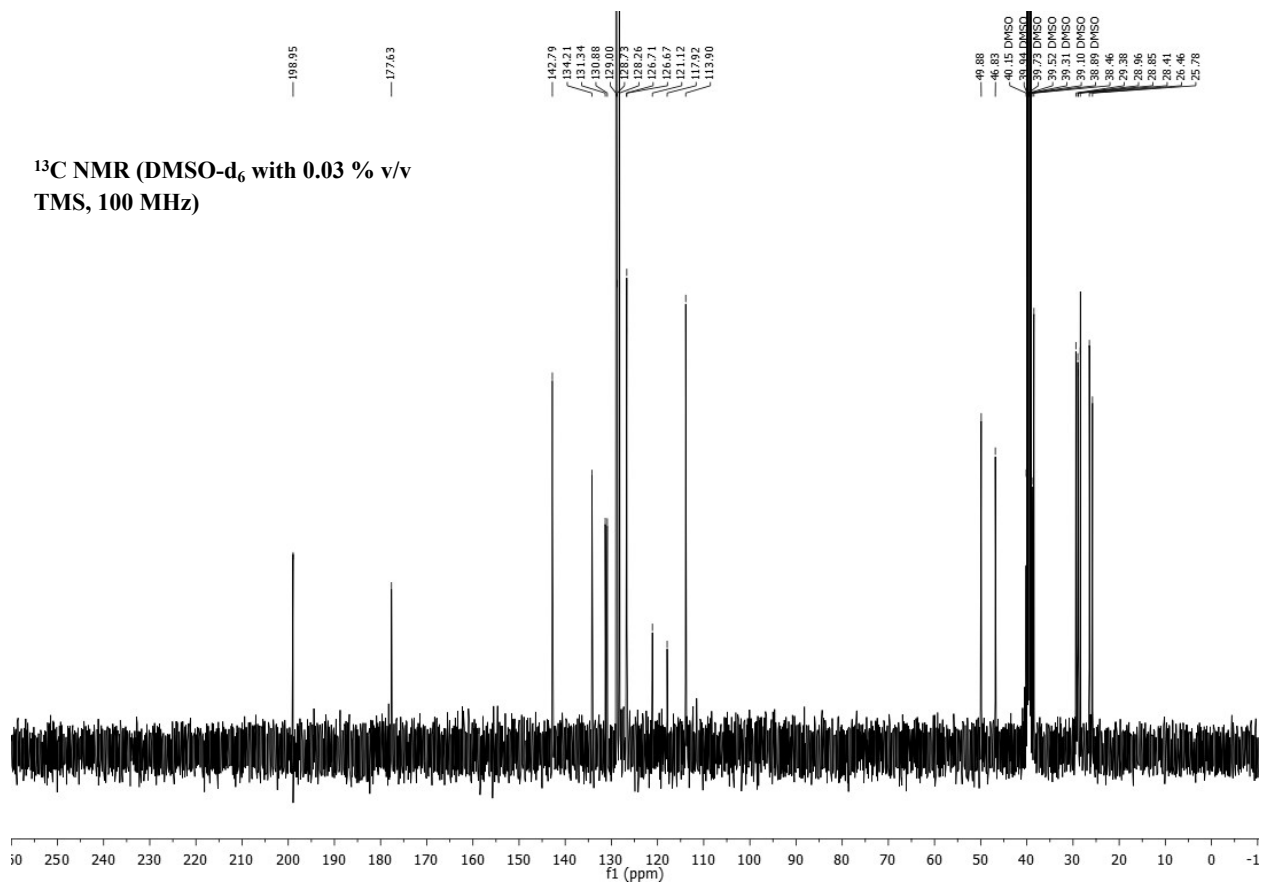

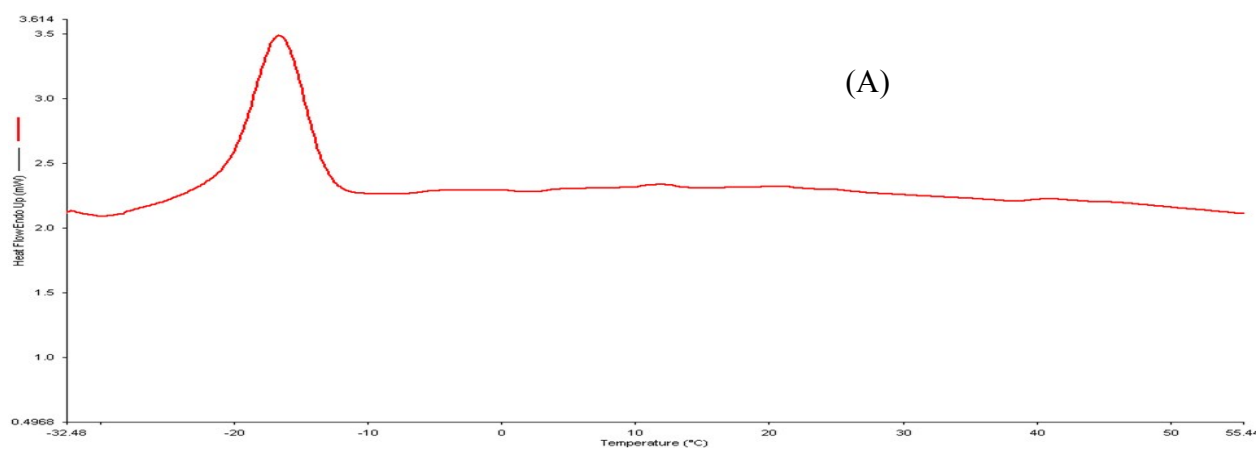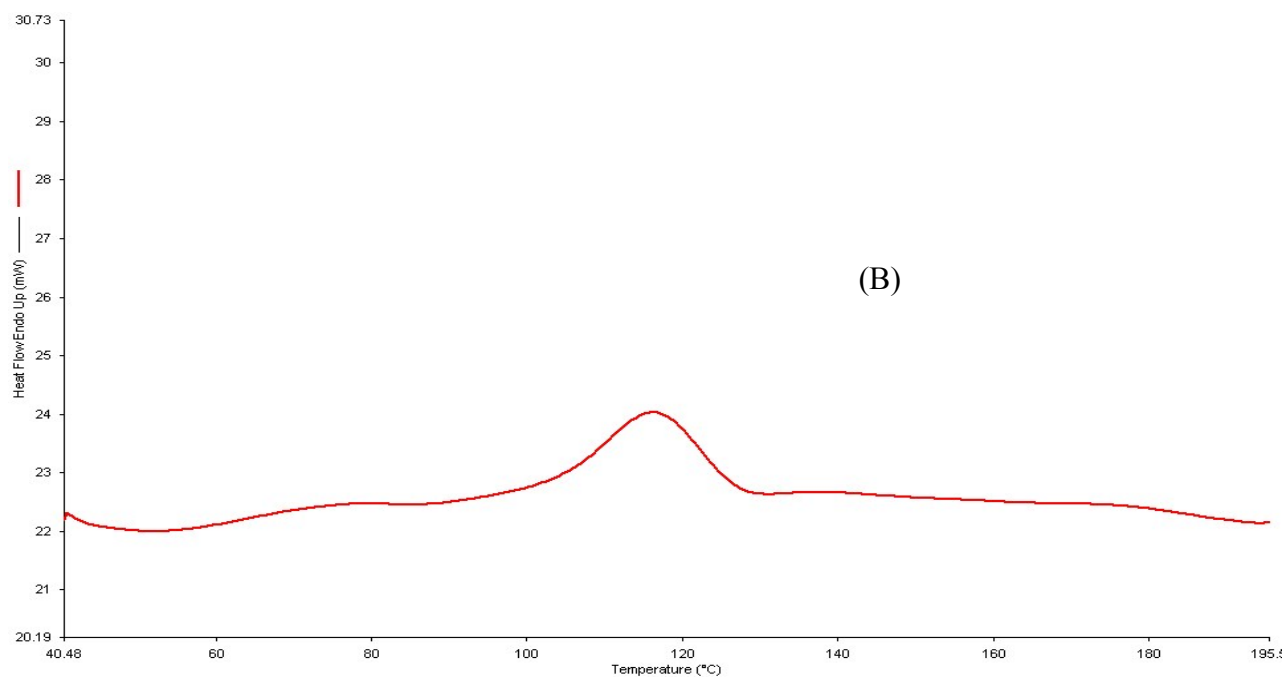

Figure S1. DSC traces of (A) MIL **1**; (B) dicationic MIL intermediate **2b**;

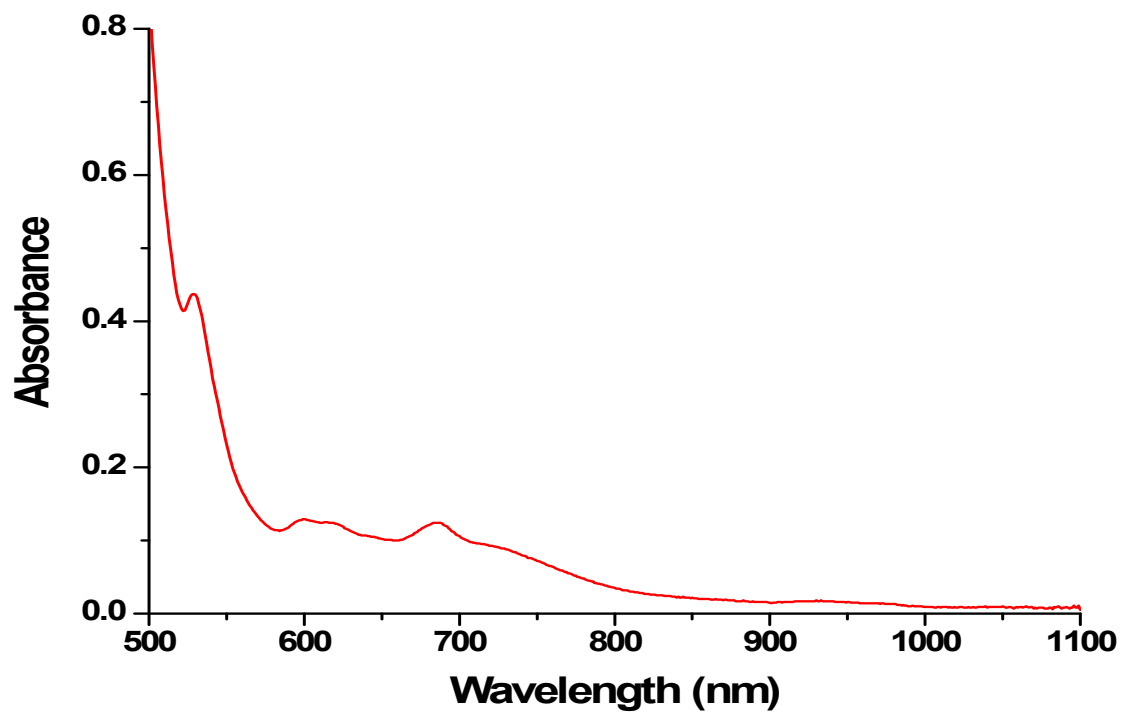

Figure S2. Absorbance spectrum of bromotrichloroferrate  $[\text{FeCl}_3\text{Br}^-]$  anion

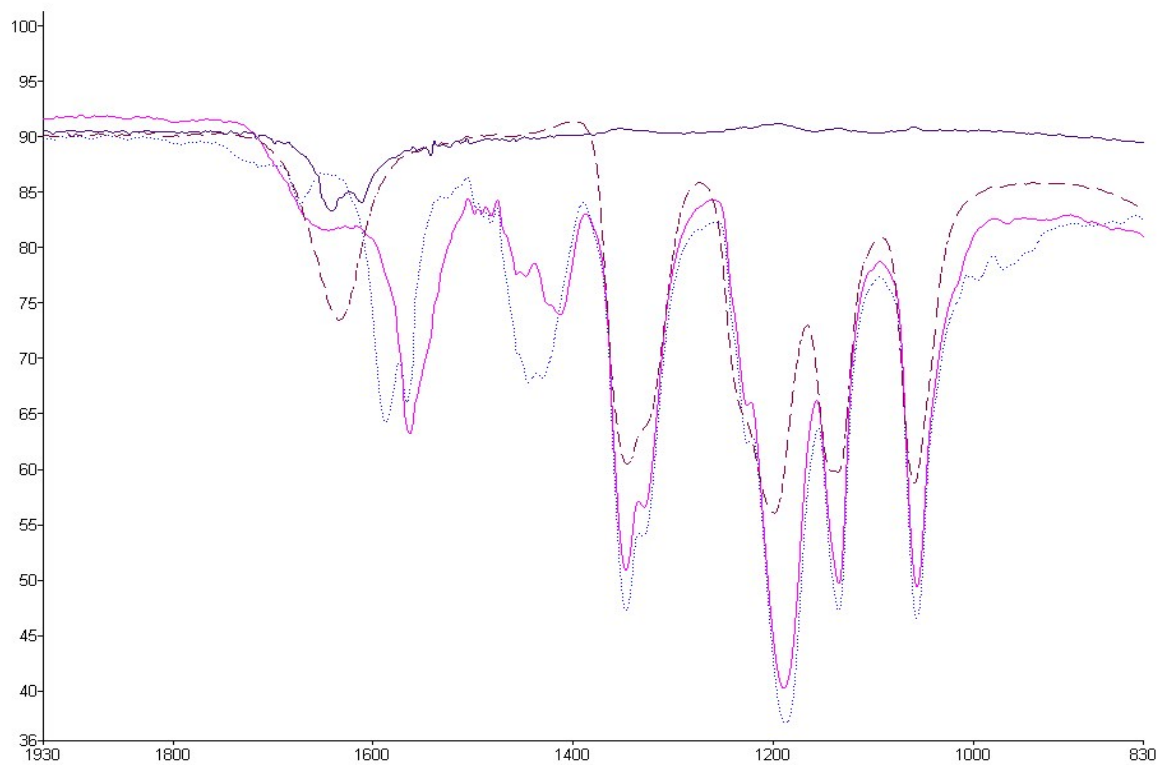

Figure S3. Representative IR overlay for Fe(III) carboxylate-based hydrophobic MIL 4 and compounds involved in its synthesis. FeCl<sub>3</sub>·6H<sub>2</sub>O (—); LiNTf<sub>2</sub> (- - -); Compound 4d (—); MIL 4 (.....)

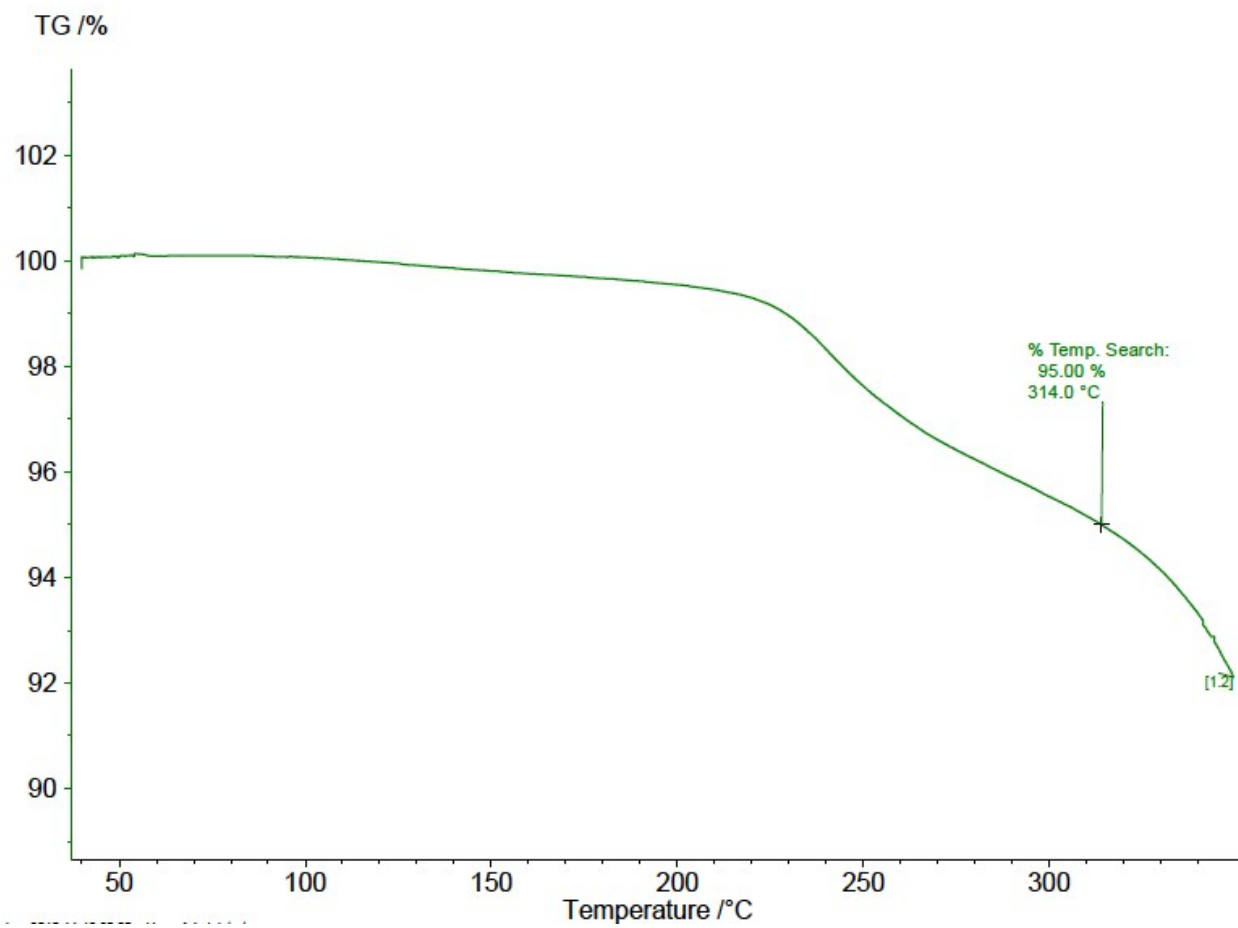

Figure S4. Representative TGA trace for hydrophobic MIL 3.

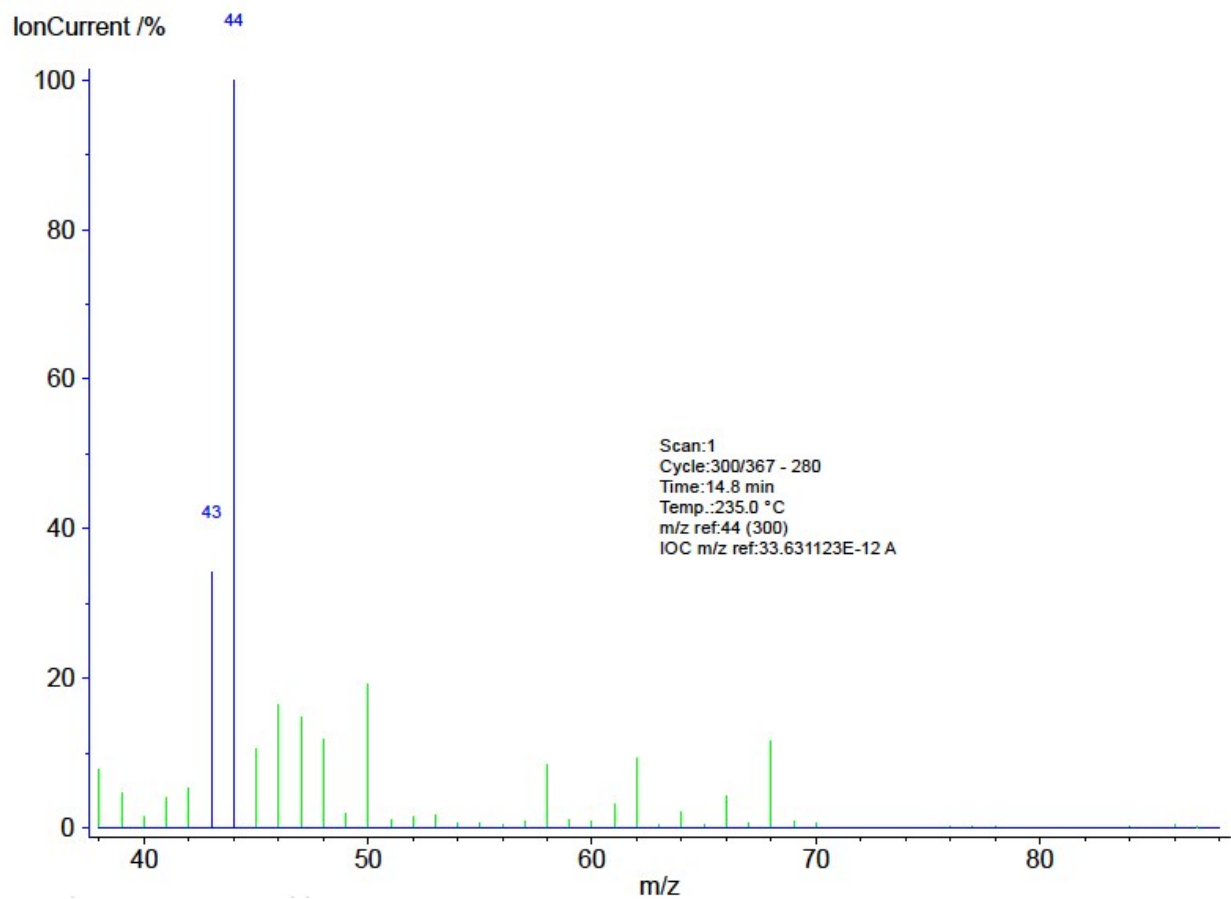

Figure S5. Mass spectrum of the evolved gases during the TGA experiment for the Fe(III) carboxylate-based MIL **3**. The spectrum shown was collected when the sample temperature was 235 °C.



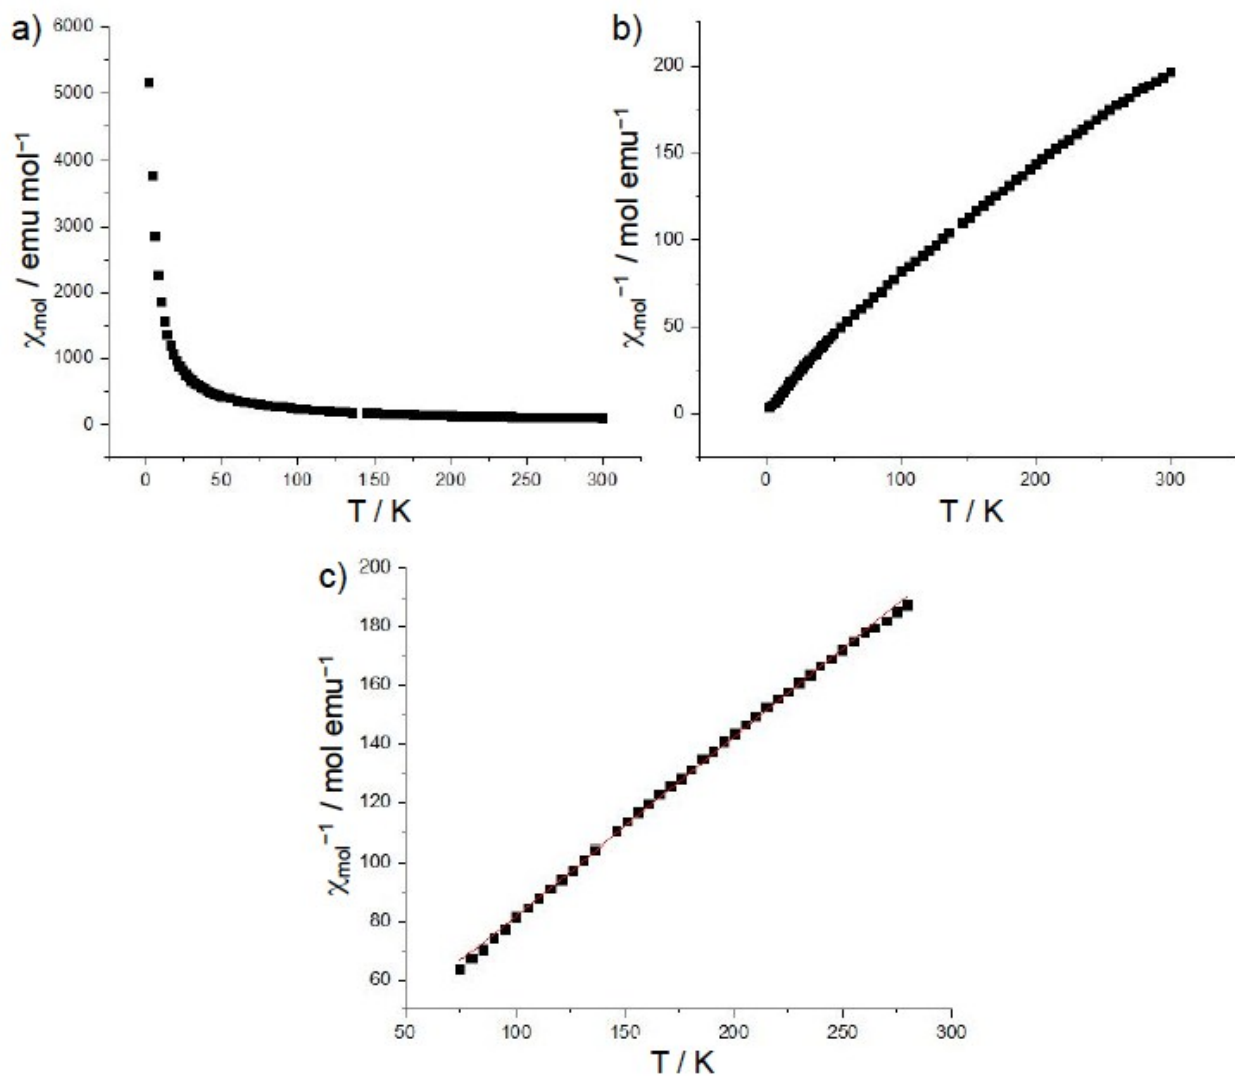

Figure S6. Temperature dependence of the (a) molar magnetic susceptibility and the (b) reciprocal molar susceptibility for MIL 3 using a field of 20,000 Oe. Panel (c) shows the linear fit for reciprocal molar susceptibility versus temperature from 280 K down to 75 K.

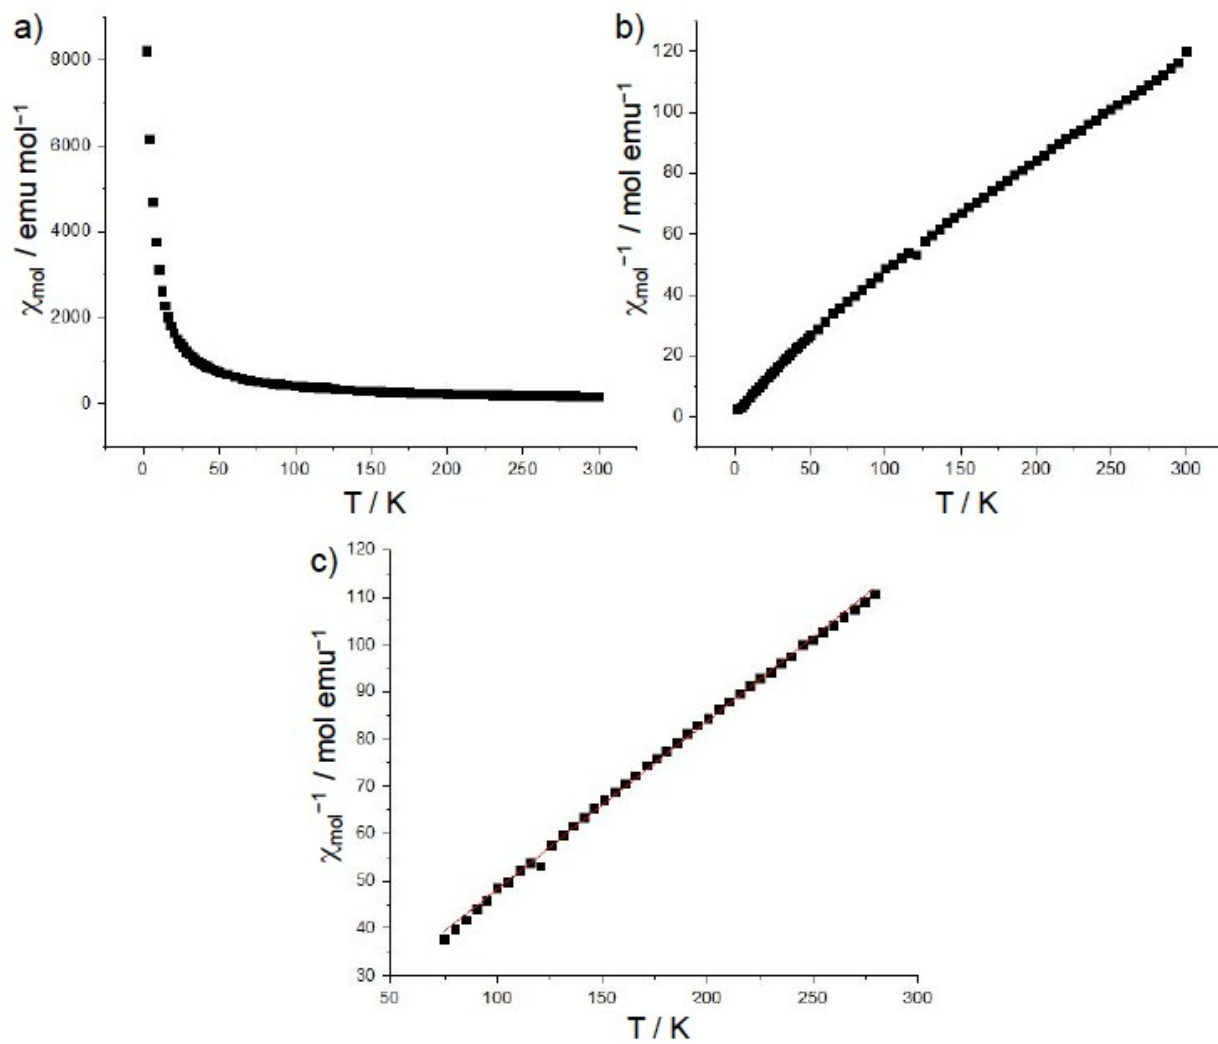

Figure S7. Temperature dependence of the (a) molar magnetic susceptibility, the (b) reciprocal molar susceptibility, and the (c) linear fit for reciprocal molar susceptibility versus temperature from 280 K down to 75 K for MIL **5** using a field of 20,000 Oe.
